1 **Development of a new faecal DNA extraction method (HV-**  
2 **CTAB-PCI) for amplification of mitochondrial and**  
3 **nuclear markers used in genetic analyses of dugongs**  
4 **(*Dugong dugon*)**

5 Vicky Ooi<sup>1\*</sup>, Lee McMichael<sup>2</sup>, Margaret E. Hunter<sup>3</sup>, Aristide Takoukam Kamla<sup>4,5</sup>, Janet M.  
6 Lanyon<sup>1</sup>

7

8 <sup>1</sup>School of Biological Sciences, The University of Queensland, St Lucia, Queensland,  
9 Australia

10 <sup>2</sup>School of Veterinary Science, The University of Queensland, Gatton, Queensland, Australia

11 <sup>3</sup>U.S. Geological Survey, Sirenia Project, Wetland and Aquatic Research Centre, Gainesville,  
12 Florida, USA

13 <sup>4</sup>Aquatic Animal Health Program, College of Veterinary Medicine, University of Florida,  
14 Gainesville, Florida, USA

15 <sup>5</sup>African Marine Mammal Conservation Organization, Dizangue, Littoral, Cameroon, Africa

16

17 \* Corresponding author

18 E-mail: [v.ooi@uqconnect.edu.au](mailto:v.ooi@uqconnect.edu.au)

19

20

## 21 **Abstract**

22 Non-invasively collected faecal samples are an alternative source of DNA to tissues, that may  
23 be used in genetic studies of wildlife when direct sampling of animals is difficult. Although  
24 several faecal DNA extraction methods exist, their efficacy varies between species. Previous  
25 attempts to amplify mitochondrial DNA (mtDNA) markers from faeces of wild dugongs have  
26 met with limited success and nuclear markers (microsatellites) have been unsuccessful. This  
27 study aimed to develop a new tool for sampling both mtDNA and nuclear DNA (nDNA)  
28 from dugong faeces by modifying approaches used in studies of other large herbivores. First,  
29 amplification success of genetic markers from dugong faeces was compared between an  
30 established QIAamp and a newly developed DNA extraction method. Faecal DNA extracted  
31 using a new ‘High Volume-CTAB-PCI’ (HV-CTAB-PCI) method was found to achieve  
32 comparable amplification results to extraction of dugong skin DNA. As most prevailing  
33 practices advocate sampling from the outer surface of a stool to maximise capture of  
34 sloughed intestinal cells, this study compared amplification success of mtDNA between the  
35 outer and inner layers of faeces, but no difference in amplification was found. Assessment of  
36 the impacts of faecal age or degradation on extraction, however, demonstrated that fresher  
37 faeces with shorter duration of environmental (seawater) exposure amplified mtDNA and  
38 nDNA better than eroded scats. Using the HV-CTAB-PCI method, nDNA was successfully  
39 amplified for the first time from dugong faeces. This novel DNA extraction protocol offers a  
40 new tool that will facilitate genetic studies of dugongs and other large and cryptic marine  
41 herbivores in remote locations.

42

## 43 **Introduction**

44 Genetic variation between individuals frequently influences the evolutionary  
45 resilience of species [1,2]. Small populations lacking in gene flow have low genetic diversity,  
46 which may restrict their ability to adapt to environmental changes, leaving them vulnerable to  
47 extinction [3]. As threatened wildlife species dwindle in number, studies addressing genetic  
48 variation within and between populations become crucial for continued conservation efforts.  
49 To obtain critical genetic information on free-ranging wildlife, most studies rely on direct  
50 sampling of body tissues (e.g., blood, skin) as a source of high quality DNA [4]. However,  
51 there may be logistical and/or ethical challenges in direct sampling of large, rare, cryptic, or  
52 elusive species [5]. In contrast, non-invasive sampling through collection of animal traces,  
53 such as faeces, shed hairs, or sloughed skin as a source of DNA, mitigates the need to  
54 invasively capture, restrain or in some cases, directly observe the target wildlife [6]. One  
55 drawback of sampling biological traces is that quantity and quality of DNA may be  
56 compromised [6]. However, if collected and processed appropriately, non-invasive samples  
57 may provide comparable genetic information as obtained through direct sampling [e.g., 7].

58 Utilisation of faeces as an alternative source of DNA has its challenges. Apart from a  
59 generally low yield of amplifiable target DNA, faeces may contain PCR inhibitors that  
60 originate from digestive contents or the environment in which they are voided [8]. DNA from  
61 herbivore faeces is often more difficult to amplify compared to that of carnivores, since these  
62 may contain plant secondary metabolites that inhibit PCR [9]. The use of faecal DNA for  
63 genetic studies of marine species is even more restricted due to degradation and  
64 contamination in seawater [10]. Furthermore, the age of faecal samples may impact retrieval  
65 of target DNA, i.e., higher yield and quality of target DNA may be extracted from fresh  
66 compared to old scats [11].

67 The bulk of mammalian faeces comprises water and soluble molecules such as mucin,  
68 and the remainder consists of undigested food and microflora [12]. A small portion of faeces

69 comprises epithelial cells sloughed from the host's gastrointestinal tract [13]. Based on the  
70 assumption that sloughed cells would adhere to the surface of the egesta as it passes through  
71 the gastrointestinal tract, some sampling protocols swab the surface of scats to obtain these  
72 cells [14], whilst others resort to either homogenising the faecal sample or scraping, peeling,  
73 and/or washing its surface [8]. Surprisingly, the distribution of target cells and thus host DNA  
74 within faeces appears to have remained underexplored despite increasing efforts to isolate  
75 DNA from scats. Although various extraction methods have been used to retrieve host DNA  
76 from faecal samples, there is no 'one-size-fits-all' approach that works optimally for all  
77 species. Some widely used extraction techniques include the QIAamp Fast DNA Stool Mini  
78 Kit (hereafter referred to as QIAamp) [7,15], phenol-chloroform-isoamyl alcohol (PCI)  
79 [11,16] and cetyltrimethyl ammonium bromide (CTAB) [17]. Interestingly, the 2CTAB/PCI  
80 protocol has demonstrated success in extracting DNA from herbivore faeces [18].

81         Dugongs (*Dugong dugon*) are vulnerable marine mammals that are declining  
82 throughout their range from East Africa to Vanuatu [19]. Dugongs are challenging to study as  
83 they often reside in inshore, turbid waters and remote locations where access may be limited  
84 [20]. Dugongs spend most of their lives underwater, and their short surface intervals make  
85 them difficult to approach and sample directly [21]. Consequently, few genetic data are  
86 available for dugongs throughout much of their range. Of all regions supporting dugongs,  
87 northern Australia has been best studied [22] due to relative accessibility of some locations  
88 by researchers and intermittent recovery of carcasses. Conversely, in many regions outside  
89 Australia, dugong densities are low and variable; some populations have been extirpated,  
90 some are functionally extinct [23], and most are in decline [19]. These challenges to studying  
91 dugongs has rendered a non-invasive DNA sampling approach, i.e., via faeces, increasingly  
92 desirable as it may enable population genetic studies in areas where direct sampling is  
93 impracticable.

94 Early genetic studies of dugongs analysed mtDNA from recovered carcasses [21,24].  
95 Maternally-inherited mtDNA has high mutation rates, making it an effective marker for  
96 distinguishing deep taxonomic relationships and broad population structure [25]. Although  
97 mitochondrial studies suggested two dugong maternal lineages in Australia (i.e., north-  
98 western, and eastern populations), separated at Torres Strait [21], it was only when nDNA  
99 was used that finer scale population structuring was found within southern Queensland [26].  
100 A more recent study evaluated population structure of dugongs along the entire eastern  
101 Queensland coast, using the same tandemly repeated microsatellites, and found an abrupt  
102 genetic break at the Whitsundays region, effectively separating northern and southern clusters  
103 [27]. Two less distinct subclusters were found within each of these main clusters, but a lack  
104 of tissue samples along the more remote northern coast limited discernment of population  
105 structuring along the entire coast. These patterns were also supported by analysis using 464  
106 highly discriminatory single nucleotide polymorphisms (SNPs) [27]. A SNP represents  
107 variations of a single nucleotide base within the genome of different individuals, where the  
108 least abundant allele or nucleotide form occurs in more than 1% of the population [28].  
109 Although a greater number of SNPs are required to provide the same resolution as  
110 microsatellites due to the biallelic nature of SNPs as opposed to the multiallelic nature of  
111 microsatellites, fewer genotyping errors associated with SNPs and their abundance  
112 throughout the genome have led to an increase in their use [29]. More importantly, the small  
113 target regions for SNP amplifications would allow for higher PCR amplification success in  
114 more degraded DNA such as those from faeces [30].

115 In areas where dugong tissues are difficult to obtain, faecal samples have been  
116 collected, although their use remains limited as only mtDNA has been successfully amplified,  
117 despite efforts to retrieve nDNA [21,27]. Extraction of nDNA is more challenging because  
118 target DNA from faeces is often highly degraded, and the amount of available nDNA is less

119 than that of mtDNA, since a diploid cell may contain many mitochondria but only possesses  
120 two copies of the nuclear genome [31]. However, a recent study has successfully extracted  
121 both nDNA and mtDNA from faeces of manatees, phylogenetically related to dugongs, using  
122 the QIAamp method with modifications including an additional purification step that  
123 removes PCR inhibitors [32]. Manatees are generalist herbivores that consume highly fibrous  
124 and abrasive macrophytes [33], whereas dugongs are seagrass specialists that preferentially  
125 graze on seagrasses with high nitrogen and low fibre content [34,35]. As dugongs have high  
126 apparent digestibility of low fibre seagrass [36], they produce less fibrous faeces compared to  
127 manatees [32]. Although these sirenians possess some differences in terms of diet and  
128 digestive function [37], it is likely that the extraction methods used for manatees may work in  
129 dugongs since their less fibrous diets may reduce the occurrence of PCR inhibitors in their  
130 stools.

131         The major aim of this study was to develop and validate a faecal DNA extraction  
132 protocol and improve faecal sampling methodologies to enable successful amplification of  
133 nuclear and mitochondrial markers used in population genetic studies of dugongs. The main  
134 hypothesis was that mtDNA control region and nDNA, represented by a sex marker and ten  
135 SNP markers, could be amplified from the outer surface layers of a fresh dugong stool. The  
136 first objective was retrieval of sufficient target DNA from dugong faeces, using an optimal  
137 DNA extraction method, for consistent amplifications of zinc finger region (ZFX) within the  
138 X-chromosome of nDNA and the control region of mtDNA. The second objective  
139 investigated whether amplification success of both markers and the amount of target DNA  
140 differed between the outer versus inner layers of faeces with different levels of environmental  
141 exposure. The third objective sought amplification of ten previously developed SNPs [27],  
142 from fresh dugong faeces, using the optimal DNA extraction protocol. A representative SNP

143 was also amplified in dugong faeces of different environmental exposure levels (EELs) to  
144 explore the impacts of degradation on SNP amplification success.

145

## 146 **Methods**

### 147 **Field sampling**

148 Two types of dugong faeces were collected: *Ex-ōceanum* faeces were those that were  
149 collected when dugongs were held out of water and were thus uncontaminated by seawater,  
150 whilst *in-ōceanum* faeces were those that were collected from the ocean and were  
151 contaminated by seawater.

152 Matched *ex-ōceanum* faeces (n= 8) and skin tissues (n= 8) were collected from live  
153 wild dugongs during the 2018 annual health assessment program in Moreton Bay,  
154 Queensland (27.4°S, 153.2°E), Australia [38]. Dorsal skin tissues were sampled using a skin  
155 scraper [39], and freshly voided *ex-ōceanum* faeces were collected onto a clean frisbee placed  
156 under the anus of each dugong held on deck [38]. Frozen *ex-ōceanum* faecal samples  
157 collected in 2016 (n= 8) and 2017 (n= 8) were also used in this study. *Ex-ōceanum* faeces  
158 represent the freshest and least degraded of all faecal types and were categorised under  
159 Environmental Exposure Level 1 (*ex-EE-L1*). The surfaces of these faeces were textured,  
160 ranging from yellow-brown, or light brown to dark brown, and the inner core was usually  
161 more dough-like as opposed to fibrous with yellowish pigmentation.

162 *In-ōceanum* faeces of four different EELs or exposure states were collected from the  
163 ocean at different time points post-elimination. Fresh *in-ōceanum* faeces with exposure level  
164 2 (*in-EE-L2*) (n= 8) were collected from the benthos through free-diving immediately as the  
165 feeding herd of dugongs was seen leaving an area (estimated at < 1 h post-elimination).

166 Floating faeces of exposure level 3 (*in*-EE-L3) (n= 8) were collected from the ocean surface  
 167 in an area where the feeding herd was spotted nearby (~ 2 – 4 h post-elimination). The *in*-EE-  
 168 L2 and *in*-EE-L3 faeces have comparable morphologies: cylindrical (large calibre) of  
 169 variable length. Their inner core usually presents comparable to *ex*-EE-L1; however, fibre  
 170 proportion can be variable. Their colours are usually dark to light brown. Exposure level 4  
 171 (*in*-EE-L4) (n= 8) faeces were collected from the ocean surface where individuals were  
 172 spotted foraging at a distance (~ 5 – 7 h post-elimination). Morphologically, they are usually  
 173 smaller and/or shorter than *in*-EE-L2 and *in*-EE-L3, though large specimens have been found.  
 174 The shape of *in*-EE-L4 faeces remains cylindrical, yet jagged edges and lumps emerge in this  
 175 category. Their colours are darker brown to black on the surface and the inner core are more  
 176 yellowed with a slightly more fibrous nature. The most eroded faeces, exposure level 5 (*in*-  
 177 EE-L5) (n= 8), were collected from the ocean surface in an area where no dugongs were  
 178 spotted (possibly > 7 h post-elimination). The *in*-EE-L5 faeces tend to be in small pieces as  
 179 they are broken down by ocean currents and/or coprophagous animals since they were  
 180 exposed to the environment for the longest duration. The eroded faeces commonly appear  
 181 charred black or dark brown in colour, and the inner core is mostly highly fibrous, though in  
 182 some cases, they retained less fibre. As they are found in small pieces, the shape can differ  
 183 from being cylindrical to round-like. (Summary: Table 1, Description: Fig 1).

184

185 **Table 1. Summary on the description and categories of all faecal samples collected and**  
 186 **used in this study, including the year and place of collection.**

| Type of faeces    | Environmental exposure level | Abbreviation     | Hours post elimination ( <i>approx.</i> ) | Description of faecal collection | Year of collection | Place of collection    |
|-------------------|------------------------------|------------------|-------------------------------------------|----------------------------------|--------------------|------------------------|
| <i>Ex-ōceanum</i> | 1 (Most fresh)               | <i>Ex</i> -EE-L1 | 0                                         | Collected out of water on a boat | 2016, 2017, 2018   | Moreton Bay, Australia |



|                   |            |                 |               |                                                                               |      |                                            |
|-------------------|------------|-----------------|---------------|-------------------------------------------------------------------------------|------|--------------------------------------------|
| <i>In-ōceanum</i> | 2          | <i>In-EE-L2</i> | ~ Less than 1 | Collected as feeding herd was seen leaving an area                            | 2022 | Fisherman's Gutter, Moreton Bay, Australia |
| <i>In-ōceanum</i> | 3          | <i>In-EE-L3</i> | ~ 2 to 4      | Collected where the feeding herd was spotted nearby                           | 2016 | Clairview, Australia                       |
| <i>In-ōceanum</i> | 4          | <i>In-EE-L4</i> | ~ 5 to 7      | Collected where feeding herd or individual dugongs were spotted at a distance | 2015 | Cleveland Bay, Australia                   |
| <i>In-ōceanum</i> | 5 (Eroded) | <i>In-EE-L5</i> | ~ More than 7 | Collected in an area where no dugongs were spotted                            | 2016 | Newry Island, Australia                    |

187

188 **Fig 1. Classification of dugong faeces into five categories as illustrated with an above**  
 189 **view (top) and transverse cross-section (bottom).**

190 Comparing freshly excreted samples on deck to those most aged in the ocean, a respective  
 191 transition of surface colour was observed from lighter to darker, yellow-brown, or light  
 192 brown to black, while sizes trended from large to small, and core composition generally  
 193 retaining higher fibre proportion over time. (A) *Ex-ōceanum* faeces (*ex-EE-L1*), originating  
 194 beneath the dugong, were flattened in a shallow frisbee. Thus, the above view displays a  
 195 wider shape (top) and a flatter profile from the side (bottom). (B) *In-ōceanum* Level 2 and 3  
 196 faeces. (C) *In-ōceanum* Level 4 faeces. (D) *In-ōceanum* Level 5 faeces.

197

198 Faeces were placed in a ziplock bag upon retrieval, stored in an esky in the field, and  
 199 later frozen at -20 °C. Skin tissues and a single liver tissue sample from a neonate dugong,  
 200 were used in this study as positive controls; both mtDNA and nDNA have been previously  
 201 extracted from these tissue types [26].

202

## 203 **Experimental Design**

204 To develop an appropriate protocol for DNA extraction from dugong faeces, two  
205 faecal sampling and two processing techniques were compared, and the approach that  
206 recovered the highest amount of total (dugong and exogenous) DNA and target (dugong)  
207 mtDNA was used in all further extractions. Two DNA extraction methods, i.e., the QIAamp  
208 method and a newly developed ‘High volume-CTAB-PCI’ (HV-CTAB-PCI) method, were  
209 tested. Total DNA concentration extracted using each protocol, and the amplification success  
210 (including each of PCR and triplicate success) of mtDNA control region and ZFX (sex  
211 marker) were compared (S1 Fig A). PCR success represents the percentage of samples  
212 amplified, while triplicate success represents the number of replicates amplified out of three  
213 technical replicates for each sample.

214 The QIAamp method was used to extract DNA from the outer surface and inner core  
215 of dugong faeces of four different EELs (all except *in-EE-L2* faeces). The amount of DNA  
216 used in qPCR reactions was normalised to enable comparisons between faecal samples. Total  
217 DNA concentration, relative amount of dugong mtDNA extracted, and amplification success  
218 were compared under a two-factorial design (S1 Fig B). The HV-CTAB-PCI method was  
219 used to extract DNA from dugong faeces of five different EELs, and both mtDNA control  
220 region and ZFX (nDNA) were amplified. Total extracted DNA concentration, and  
221 amplification success of each marker were compared between faeces of different EELs (S1  
222 Fig B).

223 DNA extracted using the HV-CTAB-PCI method from *in-EE-L2* faeces was used to  
224 trial the amplification of ten SNP primer sets, and amplification success was compared. One  
225 SNP marker was selected to be amplified using DNA extracted with the HV-CTAB-PCI  
226 method from all *in-ōceanum* faeces, and amplification successes were compared (S1 Fig C).

227

## 228 **Faecal sampling and processing**

229           Using a sterile surgical blade, 220 mg of faecal material was scraped from the outer  
230 surface of 16 *ex-ōceanum* faecal samples, each weighed and stored in a 2 mL microcentrifuge  
231 tube (Note: For inner core sampling, the stool was broken in half and faecal material from the  
232 inner core of faeces was sampled). Each faecal sample was then either transferred into a  
233 sterilised mortar and ground into a fine powder with a pestle using liquid nitrogen (N<sub>2</sub>)  
234 (referred to as ‘scrape-and-grind’ technique) (n= 8) or left unground (referred to as ‘scrape-  
235 only’ technique) (n= 8) (Fig 2).

236           A further eight *ex-ōceanum* faeces were sampled through swabbing the entire outer  
237 surface using a rayon swab (Copan, CA, USA) (referred to as ‘swabbing’ technique). Once  
238 the swab tip was entirely covered in faecal material, it was transferred into a 2 mL tube, and  
239 the swab’s shaft was trimmed to fit. No further processing was conducted (Fig 2).

240

### 241 **Fig 2. Faecal sampling and processing techniques used in this study.**

242 Faecal material was either scraped from the outer surface of faeces or swabbed along the  
243 entire faeces for DNA extraction. When faecal material was obtained via scraping, it was  
244 either further processed by grinding in liquid nitrogen prior to the addition of lysis buffer  
245 (Buffer ATL) or added directly with lysis buffer without any processing done. When faecal  
246 material was sampled using the swabbing technique, no further processing was performed.

247

## 248 **DNA extraction from faeces**

### 249 **QIAamp protocol**

250 DNA was extracted using QIAamp Fast DNA Stool Mini Kit (#51604, Qiagen,  
251 Germany). When swabbing or scrape-only techniques were used, 1 mL of InhibitEX  
252 buffer was added into the 2 mL tube containing the faecal sample [32]. When scrape-  
253 and-grind technique was used, 500  $\mu$ L of InhibitEX buffer was added to the mortar with  
254 ground faeces for further grinding prior to the transfer of faecal mixture back into the 2  
255 mL tube, and another 500  $\mu$ L was used to rinse the remaining faeces from the mortar into  
256 the same tube. The resultant mixture was vortexed for 1 min (Note: swab was removed  
257 after vortexing) and centrifuged for 1 min at 20,000 g (14,000 rpm) to pellet the stool  
258 particles. The remainder of the extraction was performed following manufacturer's  
259 instructions, but by using 800  $\mu$ L of supernatant from the lysate, and subsequently equal  
260 amount of Buffer AL and 95 % ethanol, with a final 100  $\mu$ L elution volume.

### 261 **HV-CTAB-PCI protocol**

262 An extraction protocol was developed using the lysis buffers and general concept of the  
263 2CTAB/PCI method [18]. Approximately 1 g of faecal material was processed using the  
264 scrape-and-grind technique, and 1 mL of Lysis Buffer 1 (LB1: CTAB 2 %, Tris– HCL  
265 100 mM, EDTA 20 mM, NaCl 1.4 M, pH 7.5) was added to the mortar to further grind  
266 the powdered faeces before the mixture was transferred into a 15 mL tube. This was  
267 repeated twice to ensure that any remaining faecal material in the mortar was collected.  
268 Another 2 mL of LB1 was added into the same tube, making a total 5 mL LB1 added to  
269 the faecal sample. The mixture was vortexed and incubated at 60 °C for 3 h, with  
270 occasional mixing for cell lysis. After centrifuging at 3,150 g (4,000 rpm) for 12 min, 4  
271 mL of supernatant was transferred into a new 15 mL tube and equal volume of phenol:  
272 chloroform: isoamyl alcohol (PCI, 21:20:1) was added to the supernatant, and gently  
273 mixed. The mixture was centrifuged as above, and 3 mL of the aqueous phase was  
274 transferred into a new 15 mL tube. Next, 330  $\mu$ L of Lysis Buffer 2 (LB2: CTAB 10 %,

275 NaCl 0.5 M, pH 5.5) was added to the supernatant, and incubated at 60 °C for 4 h, with  
276 occasional mixing, for further lysis. Thereafter, 104  $\mu$ L of protease (#P5147, Sigma  
277 Aldrich, USA) was added to the lysate to digest proteins for 1 h at 60 °C. Then, equal  
278 volume (3434  $\mu$ L) of PCI was added to the mixture, gently mixed, and centrifuged as  
279 above. Three mL of the aqueous phase was transferred into a new 15 mL tube and equal  
280 volume of isopropanol was added for overnight DNA precipitation at -20 °C. The sample  
281 was centrifuged for 20 min at 8000 g (5,200 rpm), and all supernatant was decanted. The  
282 pellet was washed once with 400  $\mu$ L of 70 % ethanol. After being vortexed and  
283 centrifuged at 3,150 g for 12 min, the supernatant was decanted. The pellet was air dried  
284 at room temperature for 15 min and resuspended in 250  $\mu$ L of TE buffer (10 mM Tris–  
285 HCl, 1 mM EDTA, pH 8).

286

## 287 **DNA extraction from skin**

288 DNA was extracted using DNeasy Blood and Tissue kit (#69504, Qiagen, Germany).  
289 Approximately 10 mg of dugong skin tissue was ground to fine powder using liquid N<sub>2</sub>, and  
290 180  $\mu$ L of Buffer ATL was added into the mortar for further grinding. The mixture was  
291 transferred into a 1.5 mL tube, and the addition of another 50  $\mu$ L of Buffer ATL to the mortar  
292 aided recovery of any remaining tissue. The rest of the extraction followed manufacturer's  
293 protocol, using a 3 h incubation period, with 100  $\mu$ L elution in a 1.5 mL tube. A centrifuging  
294 step was added following the addition of Buffer AL to remove precipitate, and ethanol was  
295 added to the supernatant. Using 2  $\mu$ L of DNA extract, concentration (ng/ $\mu$ L) and purity  
296 (A260/280 and A260/230) of all extracted DNA were measured using NanoDrop™ 1000  
297 Spectrophotometer (Thermo Fisher Scientific, USA). DNA isolates were stored at -80 °C  
298 until use.

299

## 300 Real-time PCR assays

301 Quantitative polymerase chain reaction (qPCR) was conducted in a CFX96 Touch Real-Time  
302 PCR Detection System (Bio-Rad, USA), using 96-well PCR plates, and a ‘no template  
303 control’ was used to detect contamination. DNA extracted from tissue was used as positive  
304 control. Melt curve analysis was performed to determine melt temperature of the primers and  
305 to detect presence of non-specific amplifications.

### 306 mtDNA and ZFX markers

307 The control region of mtDNA and the ZFX region of nDNA were amplified using  
308 specific primers developed by Tol *et al* [40] and McHale *et al* [41], respectively (Table  
309 2). These markers were used throughout the entire study except for SNP amplifications.

310 **Table 2. Forward and reverse primer sequences for mtDNA control region and ZFX**  
311 **markers used in this study, with their corresponding amplicon sizes and annealing**  
312 **temperatures.**

313

| Locus                 | Forward primer sequence (5'-3') | Reverse primer sequence (5'-3') | Amplicon size (bp) | Annealing temp (°C) | Reference |
|-----------------------|---------------------------------|---------------------------------|--------------------|---------------------|-----------|
| 5' end control region | CGCGCGCTATGTA CTTCGT            | GGGGTAAGTAGTGTAAATGCACG         | 110                | 65                  | [40]      |
| ZFX                   | AAGCATAGTAAAGAGATGCCGT          | ATGTCACACTTGTGGGGGTA            | 230                | 58                  | [41]      |

314

315 PCRs were performed with a 20 µL reaction volume, each consisting of a variable  
316 amount of total DNA (Table 3), variable concentration of forward and reverse primers  
317 (Table 3), nuclease-free water, and 10 µL of PowerUp™ SYBR™ Green Master Mix  
318 (Applied Biosystems, USA).

319 **Table 3. Summary of the total DNA (ng) and concentrations of forward and reverse**  
 320 **primers ( $\mu\text{M}$ ) added to the PCR reaction for the corresponding experiments and DNA**  
 321 **extraction methods.**

| DNA extraction method | Usage                                                                                         | Primer | Total DNA added (ng) | Concentration of forward and reverse primers used ( $\mu\text{M}$ ) |
|-----------------------|-----------------------------------------------------------------------------------------------|--------|----------------------|---------------------------------------------------------------------|
| <b>QIAamp</b>         | Compare faecal sampling techniques                                                            | mtDNA  | 50                   | 0.1                                                                 |
| <b>QIAamp</b>         | Compare DNA extraction method<br>Compare faecal layer sampling on faeces of different quality | mtDNA  | 100                  | 0.1                                                                 |
| <b>QIAamp</b>         | Compare DNA extraction method                                                                 | ZFX    | 100                  | 0.5                                                                 |
| <b>HV-CTAB-PCI</b>    | Compare DNA extraction method,<br>Compare faecal quality                                      | mtDNA  | Neat DNA extracted/2 | 0.1                                                                 |
| <b>HV-CTAB-PCI</b>    | Compare DNA extraction method,<br>Compare faecal quality                                      | ZFX    | Neat DNA extracted/2 | 0.3                                                                 |
| <b>HV-CTAB-PCI</b>    | SNP amplification                                                                             | SNP    | Neat DNA extracted/2 | 0.5                                                                 |

322

323 When DNA extracted with QIAamp method was used, the amount of total DNA added to  
 324 the reactions was standardised and served as a normaliser to enable comparisons between  
 325 samples. For the comparison of sampling from different layers of faeces of different  
 326 EELs, a pilot experiment was conducted to determine whether 10 or 100 ng of total DNA  
 327 should be used in the reactions (S2 Fig). One-hundred ng of total DNA was chosen  
 328 because eroded faeces appeared to have higher PCR success using this amount, although  
 329 the difference was not statistically significant. When DNA extracted with HV-CTAB-  
 330 PCI method was used, a 1:2 dilution factor provided the most consistent amplification of  
 331 all markers in the dilution experiments and was thus used for all subsequent PCR  
 332 reactions.

333 Cycling conditions were 50 °C for 2 min, then 95 °C for 2 min, followed by 45 cycles of  
 334 95 °C for 15 s, respective annealing temperature (Table 2) for 1 min, and ending with a  
 335 melt profile from 65 °C to 95 °C, with 0.1 °C increments.

### 336 **SNP markers**

337 The 10 SNP primers used were developed by McGowan [27] (Table 4). PCRs were  
 338 performed as described previously. Total DNA diluted 1:2 was added to each reaction,  
 339 and 0.5 µM of forward and reverse primers were used (Table 3).

340 **Table 4. Forward and reverse sequences of SNP primers used in this study, with their**  
 341 **corresponding amplicon sizes and annealing temperatures.**

342

| SNP Locus | Forward primer sequence (5'-3') | Reverse primer sequence (5'-3') | Amplicon size (bp) | Annealing temp (°C) | Reference |
|-----------|---------------------------------|---------------------------------|--------------------|---------------------|-----------|
| Dug12     | TCAGAAACAGAGCAACCAAAAA          | CTTTGGAGTCTGAGCTCTGGA           | 85                 | 60                  | [27]      |
| Dug40     | TGATGAGCTAAACTAAACAGAAACC       | TGTTTCATGAGGTTAAGGGGA           | 92                 | 60                  |           |
| Dug50     | GGGCTCCAGCTCTCACTGTA            | GGTGATTATCAAACCTCTTCCAGA        | 108                | 60                  |           |
| Dug51     | ACCATGACCAAGTGGGATTC            | AAAACAAAATACAAGAACCACATGA       | 76                 | 60                  |           |
| Dug53     | GATCTGTTGCGTTGCTCTTG            | TCTATTTCAGGGCTGGCATG            | 65                 | 60                  |           |
| Dug54     | GCAGGCTGCACAATTAACCTTTA         | GAGCACCCGTAAGGGAAAC             | 98                 | 60                  |           |
| Dug 60    | TGCCAGATTCTAGCTTGG              | TCTCAGTTAGTGGCAACTCCA           | 71                 | 60                  |           |
| Dug62     | AAGCATCAAAGGAAGATGCAA           | GGTAGCATATGATCAGGAACCG          | 58                 | 60                  |           |
| Dug63     | TTCAAAGTTGACTGATAGTGAGAAA       | GCTGTGCTAATTCTGGGGTC            | 73                 | 60                  |           |
| Dug64     | TGTAGGAAGTCGGGAGTTGG            | TTTATTCCCACTGCGATTC             | 70                 | 60                  |           |

343

344 Cycling conditions were 50 °C for 2 min, 95 °C for 2 min, followed by 45 cycles of 95  
 345 °C for 15 s, 60 °C for 30 s, 72 °C for 30 s, and 72 °C for 15 min. A melt profile from 65  
 346 °C to 95 °C, with 0.5 °C increments was performed.

347

### 348 **qPCR intra-assay and inter-assay variability**



349 PCR reactions were performed in triplicate to account for intra-assay variability, and  
350 the results were averaged for final analysis. To account for inter-assay variability, threshold  
351 cycle ( $C_T$ ) was manually set to the same value using the CFX Maestro software (Bio-Rad,  
352 USA) when  $C_T$  values were compared, and tissue control was used as an inter-plate calibrator  
353 in each plate when relative quantity was calculated and compared.

354

### 355 **Primer efficiency and linearity**

356 A standard curve was created for both mtDNA and ZFX primers through dilution  
357 experiments, starting from 1000 ng of total DNA, with seven 10-fold dilutions for two skin  
358 DNA isolates. The linear dynamic range (LDR) and limits of detection (LOD) for each  
359 primer sets were determined from dilution curves, and PCR efficiency ( $E$ ) was calculated  
360 from the slope of dilution curve as per Ruijter *et al* [42].

361 Five 10-fold serial dilutions and four 10-fold serial dilutions of two faecal DNA  
362 extracts, starting from  $5 \times$  neat DNA extracted were performed for mtDNA and ZFX primers,  
363 respectively. This was used to determine the most appropriate quantity of DNA extracted via  
364 the HV-CTAB-PCI method to be added to the PCR reactions.

365

### 366 **Primer specificity**

367 Unpurified PCR products were submitted to the Australian Genome Research Facility  
368 (AGRF) at The University of Queensland, Australia, for dual-direction Sanger sequencing.  
369 Sequences from mtDNA and ZFX amplifications underwent BLAST searches on GenBank,  
370 and sequence similarity was used to confirm specific amplification of respective dugong

371 DNA. The resultant SNP sequences were compared to amplicon sequences of McCarthy [43]  
372 and McGowan [27] to confirm amplification of interested regions, and to determine the SNP  
373 allele possessed by the individuals. Specificity of PCR amplicons was additionally verified  
374 through a melt curve analysis for each PCR reaction. SNP sequences were aligned and  
375 trimmed using MEGA11 software [44].

376

## 377 **Data processing**

378 As  $C_T$  value is inverse to the amount of target DNA present within a sample, the  
379 inverse of  $C_T$  value was used for comparative analyses to facilitate visualisation of results.  
380 Relative quantity of target mtDNA was calculated in the CFX-Maestro software (Bio-Rad,  
381 USA), using a tissue sample as control and *E*. The relative quantity was multiplied by  
382 100,000 for easier interpretation of small numbers. For samples that failed to amplify, a  $C_T$   
383 value of the number of PCR cycles used + 1 was assigned to enable the determination of  
384 lowest possible  $C_T$  value difference for comparison.

385

## 386 **Statistical analyses**

387 All statistical analyses were performed using *R* (version 4.2.0, [45]). For all  
388 parametric models fitted, diagnostic plots were made to check whether the assumptions for  
389 homogeneity and normality of residual variance were met. Normality was further confirmed  
390 with the Shapiro-Wilk's test. Data were log-transformed when residuals were not normal.  
391 When significant difference was found in the initial model, a post-hoc pairwise Tukey test  
392 was performed using *lsmeans* package for further pairwise analyses. False discovery rate  
393 adjusted p-values were obtained when non-parametric tests were used. Graphs were created

394 using *ggplot2* [46], *dplyr*, *hrbrthemes* [47], *Rmisc* [48], *ggpmisc* [49], *reshape*, *ggsignif* [50],  
395 and *ggpubr* [51] packages.

396 A linear mixed effects model (LMEM) from *nlme* package [52] was used to compare  
397 total DNA concentration and inverse  $C_T$  between different faecal sampling techniques, where  
398 random effects of individuals within PCR plates were accounted for. It was also used to  
399 compare log total DNA concentration recovered between different DNA extraction methods,  
400 accounting for the random effects of individuals between PCR plates. For all primers, PCR  
401 success (binary outcome: successful—if one or more amplified versus unsuccessful—none  
402 amplified) between DNA extraction methods was compared using Pearson's Chi-square test  
403 ( $\chi^2$ ), with a Monte Carlo simulation utilising 10,000 replicates, followed by post-hoc pairwise  
404 Chi-square tests. The number of amplifications within a triplicate (i.e., Triplicate success: 0,  
405 1, 2, or 3) for all primers, was compared between DNA extraction methods using Kruskal-  
406 Wallis test and post-hoc pairwise Wilcoxon rank sum ( $W$ ) test.

407 To determine the effects of environmental exposure and layers of faeces sampled on  
408 the amplification of dugong DNA, a full interactive generalised linear model (GLM) with all  
409 variables (sampling layer, faecal EELs, year of collection, individuals) was fitted to compare  
410 the total DNA concentration and relative quantity of dugong mtDNA. The Akaike  
411 Information Criterion (AIC) or stepAIC function from *MASS* package [53] was used to  
412 determine significant variables through a dual-direction stepwise model selection. A final  
413 additive LMEM was fitted to compare total DNA concentration and log relative quantity of  
414 dugong mtDNA between faecal sampling layers and faecal EELs, accounting for random  
415 effects of different individuals. The relationship between PCR success and log total DNA was  
416 tested using a quadratic GLM with binomial responses.

417 A likelihood ratio Chi-square test (LR-Chi-square test) was used to compare between  
418 interactive (sampling layer\*faecal EELs) and additive (sampling layer + faecal EELs) GLMs,  
419 and a final additive GLM with biased reduction was fitted, using *brglm2* package [54], to  
420 compare PCR success between the two explanatory variables. A LR-Chi-square test was also  
421 used to compare between four multinomial log-linear models (from *nnet* package; [53]) fitted  
422 with interactive, additive, and single explanatory effects on the triplicate success of samples.  
423 A post-hoc pairwise *W* test was then used to compare triplicate success between sampling  
424 layer and faecal EELs.

425 When HV-CTAB-PCI method was used, total DNA concentration was compared  
426 between faecal EELs using a one-way analysis of variance (ANOVA), whilst PCR and  
427 triplicate successes were compared between different faecal EELs using the  $\chi^2$  and Kruskal-  
428 Wallis tests as described earlier. Similarly, two non-parametric tests were also used to  
429 compare the PCR and triplicate successes between different primers and faecal types in SNP  
430 amplifications.

431

## 432 **Ethics Statement**

433 Dugong samples were obtained under The University of Queensland Animal Ethics Permit  
434 SBS/181/18, Scientific Purposes Permit WISP14654414, Moreton Bay Marine Parks Permit  
435 MPP18-001119, and Great Barrier Reef Marine Park Permit G14/36987.1.

436

## 437 **Results**

### 438 **PCR efficiencies, LDR and LOD**

439 PCR efficiency of tissue DNA was 96.3 % and 86.2 % for mtDNA and ZFX primers,  
440 respectively (Fig 3A). All amplifications were within LDR (1-1000ng of total DNA) and  
441 LOD (0.001 ng of total DNA) for both primers. The *E* of faecal DNA indicated slight  
442 inhibition (mtDNA= 106.3 %, ZFX= 104.7 %), which was addressed through dilutions (Fig  
443 3B).

444

445 **Fig 3. PCR dilution curves showing the efficiency (*E*) calculated in percentage for each**  
446 **primer sets.**

447 (A) The dilution curve of tissue DNA isolates extracted using the Qiagen DNeasy method.

448 (B) The dilution curve of faecal DNA isolates extracted using the HV-CTAB-PCI method.

449 The *E* showed slight inhibition for both primers, using faecal DNA isolates. The initial total  
450 DNA amount (ng) used for PCR reactions was determined from these dilutions.

451

## 452 **DNA extraction method comparison**

453 The scrape-and-grind technique yielded significantly higher concentrations of total

454 DNA ( $70.7 \pm 5.3$  ng/ $\mu$ L; mean  $\pm$  standard error) compared to the scrape-only ( $34.9 \pm 4.8$

455 ng/ $\mu$ L, Tukey-HSD:  $T_{14} = 8.361$ ,  $p < 0.001$ ) and swabbing ( $20.4 \pm 2.8$  ng/ $\mu$ L, Tukey-HSD:

456  $T_{14} = 11.762$ ,  $p < 0.001$ ) techniques (Fig 4A). Total DNA concentrations, yielded using the

457 scrape-only technique, were significantly higher than that of swabbing (Tukey-HSD:  $T_{14} =$

458  $3.401$ ,  $p = 0.011$ ). The scrape-and-grind technique also had higher inverse  $C_T$  values ( $0.040 \pm$

459  $0.001$ ) compared to scrape-only ( $0.033 \pm 0.001$ , Tukey-HSD:  $T_{14} = 6.027$ ,  $p < 0.001$ ) and

460 swabbing ( $0.035 \pm 0.001$ , Tukey-HSD:  $T_{14} = 4.413$ ,  $p = 0.002$ ) techniques (Fig 4B).

461 However, the inverse  $C_T$  values were not significantly different between scrape only and  
462 swabbing techniques (Tukey-HSD:  $T_{14} = 1.613$ ,  $p = 0.273$ ).

463

464 **Fig 4. Comparison between faecal sampling and processing techniques to determine the**  
465 **best sampling protocol for DNA extraction.**

466 Violin plot shows the distribution of the data, whilst the box plot shows the first (Q1), second  
467 (Q2) and third (Q3) quartiles, minimum, maximum values, and outliers. All DNA was  
468 extracted using the QIAamp protocol. (A) Comparison of total DNA concentration extracted  
469 using each sampling and processing technique. (B) Comparison of the inverse  $C_T$  values from  
470 mtDNA amplification using faecal DNA extracted with each sampling and processing  
471 technique. Similar letters denote no statistical significance, while different letters denote  
472 statistical significance with an alpha value of 0.05.

473

474 Total DNA concentration extracted from faeces using HV-CTAB-PCI method ( $691.9$   
475  $\pm 51.9$  ng/ $\mu$ L) was significantly higher than that extracted using QIAamp method ( $158.5 \pm$   
476  $15.8$  ng/ $\mu$ L, Tukey-HSD:  $T_{14} = 11.701$ ,  $p < 0.001$ , Fig 5A). The former method extracted  
477 more total DNA than control ( $145.4 \pm 12.6$  ng/ $\mu$ L, Tukey-HSD:  $T_{14} = 12.196$ ,  $p < 0.001$ ), but  
478 total DNA extracted using QIAamp method was not significantly different from control  
479 (Tukey-HSD:  $T_{14} = 0.496$ ,  $p = 0.875$ ). On average, the purity of faecal DNA extract was  
480 higher using QIAamp rather than HV-CTAB-PCI method (Table 5).

481

482 **Fig 5. Comparisons between two DNA extraction methods and a tissue control.**

483 (A) A violin plot with box plot showing the total DNA concentration of each DNA extraction  
 484 method. (B) A stacked bar graph showing the percent amplification that was successful (PCR  
 485 success) and unsuccessful between all DNA extraction methods for each primer. (C) A bar  
 486 graph showing the mean  $\pm$  standard error of the number of replicates that amplified in  
 487 triplicate for each DNA extraction method. Similar letters (with same colour and letter case)  
 488 denote no statistical significance, while different letters denote statistical significance ( $\alpha$ =  
 489 0.05). Different statistical comparisons made were indicated by different colour and letter  
 490 case.

491 **Table 5. Purity (A260/280 and A260/230) values of DNA extracted for each sample type**  
 492 **using the Qiagen kits and a newly developed HV-CTAB-PCI method.**

| DNA Extraction Method | Sample Type | A260/280 (mean $\pm$ std error) | A260/230 (mean $\pm$ std error) |
|-----------------------|-------------|---------------------------------|---------------------------------|
| Qiagen DNeasy         | Tissue      | 2.12 $\pm$ 0.01                 | 1.82 $\pm$ 0.04                 |
| QIAamp                | Faeces      | 1.95 $\pm$ 0.01                 | 1.27 $\pm$ 0.03                 |
| HV-CTAB-PCI           | Tissue      | 2.06 $\pm$ 0.01                 | 2.14 $\pm$ 0.01                 |
| HV-CTAB-PCI           | Faeces      | 1.67 $\pm$ 0.01                 | 1.06 $\pm$ 0.03                 |

493

494 PCR success and triplicate success for mtDNA amplification were similar between all  
 495 DNA extraction methods, as all replicates of all samples amplified successfully (Fig 5B, C).  
 496 For ZFX amplification, PCR success of HV-CTAB-PCI method was the same as control, and  
 497 PCR success of those two were significantly higher than that of the QIAamp method ( $\chi^2$ =  
 498 7.273,  $p = 0.026$ ). All samples amplified in control and HV-CTAB-PCI method, but only  
 499 37.5% of faecal samples amplified in the QIAamp method (Fig 5B). The control had  
 500 significantly higher triplicate success for ZFX amplification (Mean,  $\bar{x}$  amplification= 3/3)  
 501 compared to HV-CTAB-PCI ( $\bar{x}$  amplification= 2.1/3,  $W$  test:  $Z = 1.86$ ,  $p = 0.032$ ) and  
 502 QIAamp ( $\bar{x}$  amplification= 0.8/3,  $W$  test:  $Z = 2.69$ ,  $p = 0.004$ ) methods (Fig 5C). However,

503 triplicate success of HV-CTAB-PCI method was higher than that of QIAamp method (*W*-test:  
504  $Z= 1.86, p = 0.032$ ).

505

## 506 **Effects of EELs and faecal layers sampled**

507 Effects of sampling from different faecal layers did not depend on faecal EELs as all  
508 interactive models had higher AIC values compared to additive models (Table 6). Same  
509 results were obtained for LR-Chi-Square test (Deviance= 0.022 – 0.832,  $p > 0.842$ ).

510 **Table 6. The AIC values obtained for interactive and additive models fitted in *R* for**  
511 **different variables compared using a dual-direction stepwise model selection.**

| Response variable            | Type of model | AIC values |
|------------------------------|---------------|------------|
| Total DNA concentration      | Interactive   | 349.98     |
|                              | Additive      | 346.74     |
| Log relative amount of mtDNA | Interactive   | 930.97     |
|                              | Additive      | 929.56     |

512

### 513 ***Impacts of faecal layer sampled***

514 For faeces of all EELs, total DNA concentration extracted from the outer surface  
515 of faeces was significantly higher than that extracted from their inner core (Tukey-HSD:  
516  $T= 5.601, p < 0.001$  for all faeces; Fig 6A). The outer surface of *ex*-EE-L1 faeces had at  
517 least 2.87× more mtDNA than their inner core, while the outer surface of *in*-EE-L3, L4,  
518 and L5 faeces had at least 0.14×, 0.65×, and 0.95× more mtDNA than their inner core,  
519 respectively (Fig 6B). On average, the outer surface of all stools had at least 0.16× more  
520 dugong mtDNA than the inner core of faeces. However, none of the differences were



521 significant (Tukey-HSD:  $T = 1.222$ ,  $p = 0.919$  for all faeces). PCR success (Biased-  
522 Reduction-GLM:  $Z = 0.373$ ,  $p = 0.709$ ; Fig 6C) and triplicate success (Likelihood-ratio=  
523  $0.832$ ,  $p = 0.842$ ; Fig 6D) of mtDNA amplification were the same regardless of whether  
524 outer surface or inner core of faeces were sampled. As the layer of faeces sampled had no  
525 significant effect on the amplification success, only the outer surface of faeces was used  
526 for further comparisons.

527

528 **Fig 6. Comparison of the variables measured between outer surface and inner core of**  
529 **faeces across different environmental exposure levels (EELs) representing varying**  
530 **quality.**

531 (A) Total DNA concentration extracted from different layers of various faeces. No statistical  
532 significance was present between the faecal types, but the outer surface yielded a higher  
533 concentration of total DNA compared to the inner core for all faeces. (B) Log relative  
534 quantity of dugong mtDNA amplified from different layers of various faeces. (C) The percent  
535 mtDNA amplification that was successful and unsuccessful between different layers of  
536 various faeces. PCR success was statistically similar between all faecal types. (D) Triplicate  
537 success between different layers of various faeces. Similar letters denote non-significance,  
538 while different letters denote statistical significance ( $\alpha = 0.05$ ).

### 539 ***Impacts of environmental exposure***

540 When the QIAamp method was used, the total DNA concentration extracted from  
541 *ex*-EE-L1 ( $87.0 \pm 12.8$  ng/ $\mu$ L), *in*-EE-L3 ( $55.2 \pm 5.1$  ng/ $\mu$ L), *in*-EE-L4 ( $86.5 \pm 10.0$   
542 ng/ $\mu$ L), and *in*-EE-L5 ( $59.2 \pm 6.06$  ng/ $\mu$ L) faeces were not significantly different from  
543 each other regardless of the faecal layer sampled (Tukey-HSD:  $-2.877 < T_{28} < 0.970$ ,  $p >$   
544  $0.123$ ; Fig 6A). The amount of dugong mtDNA extracted from *ex*-EE-L1 faeces was at

545 least 46× less than that extracted from *in*-EE-L3 faeces (Tukey-HSD:  $T_{30} = -4.548$ ,  $p <$   
546 0.001), but was 247,253× higher than that isolated from *in*-EE-L5 faeces (Tukey-HSD:  
547  $T_{30} = 5.105$ ,  $p < 0.001$ ) (Fig 6B). Amount of dugong mtDNA was not significantly  
548 different between *ex*-EE-L1 and *in*-EE-L4 faeces (Tukey-HSD:  $T_{29} = 1.910$ ,  $p = 0.246$ ).  
549 However, amount of dugong mtDNA in *in*-EE-L3 faeces was at least 38,322× and  
550 11,697,397× higher than that of the *in*-EE-L4 (Tukey-HSD:  $T_{29} = 6.604$ ,  $p = < 0.001$ ) and  
551 *in*-EE-L5 (Tukey-HSD:  $T_{30} = 14.405$ ,  $p = < 0.001$ ) faeces, respectively. The amount of  
552 dugong mtDNA was the same in *in*-EE-L4 and L5 faeces (Tukey-HSD:  $T_{29} = 3.049$ ,  $p =$   
553 0.081).

554 PCR success for mtDNA amplification was similar between faeces of all EELs  
555 (Tukey-HSD:  $-1.583 < Z < 1.775$ ,  $p > 0.285$ ; Fig 6C). Despite insignificant results, all *in*-  
556 EE-L3 and L4 faeces amplified, but only 70% of *ex*-EE-L1 and 68.8% of *in*-EE-L5 faeces  
557 amplified successfully. However, *in*-EE-L3 faeces had higher triplicate success ( $\bar{x}$   
558 amplification= 3/3) compared to *ex*-EE-L1 ( $\bar{x}$  amplification= 2.3/3, *W*-test:  $Z = 1.680$ ,  $p =$   
559 0.046), *in*-EE-L4 ( $\bar{x}$  amplification= 2.4/3, *W*-test:  $Z = 2.530$ ,  $p = 0.006$ ) and *in*-EE-L5  
560 faeces ( $\bar{x}$  amplification= 1.1/3, *W*-test:  $Z = 4.68$ ,  $p < 0.001$ ) (Fig 6D). Triplicate success of  
561 *ex*-EE-L1 faeces was not significantly different compared to that of *in*-EE-L4 faeces (*W*-  
562 test:  $Z = 0.444$ ,  $p = 0.672$ ) but was significantly higher than that of *in*-EE-L5 faeces (*W*-  
563 test:  $Z = 2.530$ ,  $p = 0.006$ ). The *in*-EE-L4 faeces also had a higher triplicate success than  
564 *in*-EE-L5 faeces (*W*-test:  $Z = 3.011$ ,  $p = 0.001$ ).

565 When the HV-CTAB-PCI method was used, the total DNA concentration  
566 extracted from *ex*-EE-L1 faeces ( $742.3 \pm 70.3$  ng/ $\mu$ L; mean  $\pm$  standard error) was not  
567 significantly different to that extracted from *in*-EE-L2 faeces ( $559.4 \pm 95.4$  ng/ $\mu$ L,  
568 ANOVA:  $T_{36} = 1.934$ ,  $p = 0.318$ ), but was significantly higher than that extracted from *in*-  
569 EE-L3 ( $324.1 \pm 19.8$  ng/ $\mu$ L, ANOVA:  $T_{36} = 4.372$ ,  $p = 0.001$ ), *in*-EE-L4 ( $134.8 \pm 14.4$

570 ng/ $\mu$ L, ANOVA:  $T_{36} = 9.253$ ,  $p < 0.001$ ) and *in*-EE-L5 ( $198.3 \pm 34.8$  ng/ $\mu$ L, ANOVA:  
571  $T_{36} = 7.597$ ,  $p < 0.001$ ) faeces (Fig 7A). Total DNA concentration of *in*-EE-L2 faeces was  
572 not significantly different compared to that of *in*-EE-L3 faeces (ANOVA:  $T_{36} = 2.369$ ,  $p =$   
573  $0.147$ ), but was significantly higher than that of *in*-EE-L4 (ANOVA:  $T_{36} = 7.113$ ,  $p <$   
574  $0.001$ ) and *in*-EE-L5 (ANOVA:  $T_{36} = 5.503$ ,  $p < 0.001$ ) faeces. The *in*-EE-L3 faeces also  
575 had higher concentration of total DNA compared to *in*-EE-L4 (ANOVA:  $T_{36} = 4.744$ ,  $p <$   
576  $0.001$ ) and *in*-EE-L5 (ANOVA:  $T_{36} = 3.134$ ,  $p = 0.027$ ) faeces, but total DNA  
577 concentration between *in*-EE-L4 and L5 faeces was not significantly different (ANOVA:  
578  $T_{36} = 1.610$ ,  $p = 0.501$ ).

579

580 **Fig 7. Comparison of variables measured in faeces with different environmental**  
581 **exposure levels (EELs) representing varying quality.**

582 (A) Total DNA concentration extracted from each faecal type. (B) Graph shows a positive  
583 correlation between PCR success and total DNA concentration. Lines represent mean  $\pm$   
584 standard error. (C) Percent amplification that was successful and unsuccessful for mtDNA  
585 and ZFX primers between different faecal types. (D) Triplicate success between the faecal  
586 types for both primers. Similar letters (with same colour and letter case) denote no statistical  
587 significance, while different letters denote statistical significance ( $\alpha = 0.05$ ). Different  
588 statistical comparisons made were indicated by different colour and letter case.

589

590 PCR success and triplicate success (Kruskal-Wallis:  $\chi^2 = 4.125$ ,  $p = 0.389$ ) for  
591 mtDNA amplification were the same across faeces of all EELs, as all samples amplified  
592 successfully (Fig 7C, D). Mean triplicate success for faeces of all EELs was 3, except for  
593 *in*-EE-L4 faeces which was 2.9. For ZFX amplification, faeces with higher total DNA

594 concentration tended to have higher PCR success (GLM:  $Z= 2.558$ ,  $p=0.011$ ; Fig 7B).  
595 PCR success of *ex*-EE-L1 faeces was similar to that of *in*-EE-L2 faeces ( $\chi^2= 1.195$ ,  $p=$   
596  $0.471$ ), but was significantly higher than that of *in*-EE-L3 ( $\chi^2= 5.885$ ,  $P= 0.032$ ), *in*-EE-  
597 L4 ( $\chi^2= 13.39$ ,  $p< 0.001$ ), and *in*-EE-L5 ( $\chi^2= 11.46$ ,  $p= 0.003$ ) faeces (Fig 7C). All *ex*-EE-  
598 L1 faeces amplified, but only 87.5% and 50.0% of *in*-EE-L2 and L3 faeces amplified,  
599 respectively. Only 12.5% of both *in*-EE-L4 and L5 faeces amplified. PCR success of *in*-  
600 EE-L2 faeces was not significantly different compared to that of *in*-EE-L3 faeces ( $\chi^2=$   
601  $2.618$ ,  $p= 0.283$ ), but was higher than that of *in*-EE-L4 ( $\chi^2= 9.00$ ,  $P= 0.012$ ) and *in*-EE-L5  
602 faeces ( $\chi^2= 7.244$ ,  $p= 0.015$ ). PCR success of *in*-EE-L3, L4, and L5 faeces was not  
603 significantly different from one another ( $0.275 < \chi^2 < 2.618$ ,  $p> 0.284$ ). Triplicate success  
604 of *ex*-EE-L1 faeces ( $\bar{x}$  amplification= 2.1/3) was similar to that of *in*-EE-L2 faeces ( $\bar{x}$   
605 amplification= 1.9/3, *W*-test:  $Z= 0.711$ ,  $p= 0.761$ ), but higher than that of *in*-EE-L3 ( $\bar{x}$   
606 amplification= 0.6/3, *W*-test:  $Z= 2.197$ ,  $p= 0.014$ ), *in*-EE-L4, and L5 (both  $\bar{x}$   
607 amplification= 0.1/3, both *W*-tests:  $Z= 2.759$ ,  $p= 0.003$ ) faeces (Fig 7D). The *in*-EE-L2  
608 faeces also had a higher triplicate success compared to *in*-EE-L3 (*W*-test:  $Z= 1.794$ ,  $P=$   
609  $0.036$ ), *in*-EE-L4, and L5 (both *W*-tests:  $Z= 2.473$ ,  $p= 0.007$ ) faeces, but triplicate success  
610 of *in*-EE-L3, L4 and L5 faeces were not significantly different from each other (*W*-tests:  
611  $Z < 1.029$ ,  $p> 0.152$ ).

## 612 **SNP amplifications in *in-ōceanum* faeces**

613 All *in*-EE-L2 faecal samples amplified for all dugong SNP primers, except for  
614 primers Dug12 and Dug63, in which 50% and 75% of all samples amplified, respectively  
615 (Fig 8A). The SNP regions were successfully located and aligned, showing the form of allele  
616 possessed (S3 Fig). However, PCR success was not significantly different between  
617 amplification of different primer sets ( $\chi^2 < 5.33$ ,  $p> 0.079$ ; Fig 8A). Triplicate success of

618 primer Dug12 ( $\bar{x}$  amplification= 1.3/3) was significantly lower than that of primers Dug50,  
619 Dug53, and Dug62 (All  $\bar{x}$  amplifications= 3/3,  $W$ -tests:  $Z= 1.694$ ,  $p= 0.045$ ) (Fig 8B).  
620 Triplicate success of primer Dug63 ( $\bar{x}$  amplification= 1.3/3) was equal to that of Dug12, but  
621 significantly lower than that of all other primers (All  $\bar{x}$  amplifications  $> 2.8/3$ ,  $W$ -tests:  $Z >$   
622  $2.115$ ,  $p < 0.017$ ).

623

624 **Fig 8. PCR success and triplicate success between SNP primers and faeces with different**  
625 **environmental exposure levels (EELs), representing its quality.**

626 (A) PCR success of different SNP primers amplified. No statistical significance exists  
627 between primers used. (B) Triplicate success of different SNP primers amplified. (C) PCR  
628 success between faeces of different EELs. (D) Triplicate success between faeces of different  
629 EELs. Similar letters denote no statistical significance, while different letters denote  
630 statistical significance ( $\alpha= 0.05$ ).

631

632 For amplification of SNP primer Dug54 in all *in-ōceanum* faeces, the PCR success of  
633 *in-EE-L2* faeces was significantly higher than that of *in-EE-L5* faeces ( $\chi^2= 9.600$ ,  $p= 0.008$ ),  
634 but similar to that of *in-EE-L3* and *L4* faeces ( $\chi^2 < 5.333$ ,  $p > 0.077$ ) (Fig 8C). All *in-EE-L2*  
635 faeces amplified, and 87.5%, 50.0%, and 25.0% of *in-EE-L3*, *L4*, and *L5* faeces amplified,  
636 respectively. The *in-EE-L3* faeces also had a higher PCR success compared to *in-EE-L5*  
637 faeces ( $\chi^2= 6.349$ ,  $p= 0.042$ ), but it had a similar PCR success as *in-EE-L4* faeces ( $\chi^2= 2.618$ ,  
638  $p= 0.283$ ). The PCR success of *in-EE-L4* and *L5* faeces was not significantly different ( $\chi^2=$   
639  $1.067$ ,  $p= 0.603$ ). The triplicate success of *in-EE-L2* faeces ( $\bar{x}$  amplification= 2.9/3) was  
640 significantly higher than that of the *in-EE-L3* ( $\bar{x}$  amplification= 1.6/3,  $W$ -test:  $Z= 2.382$ ,  $p=$   
641  $0.009$ ), *in-EE-L4*, and *L5* faeces (both  $\bar{x}$  amplification= 0.5/3, both  $W$ -tests:  $Z= 2.929$ ,  $p=$

642 0.002) (Fig 8D). The *in*-EE-L3 faeces also had higher triplicate success compared to *in*-EE-  
643 L4 (*W*-test:  $Z= 1.937$ ,  $p= 0.026$ ) and *in*-EE-L5 faeces (*W*-test:  $Z= 1.706$ ,  $p= 0.044$ ). However,  
644 triplicate success of *in*-EE-L4 and L5 faeces was the same (*W*-test:  $Z= 0.438$ ,  $p= 0.669$ ).

645

## 646 **Discussion**

647 This study demonstrated that mitochondrial and nuclear markers can be amplified  
648 from dugong faeces, using a novel ‘High volume-CTAB-PCI’ (HV-CTAB-PCI) DNA  
649 extraction method. Numerous modifications of the 2CTAB/PCI method by Vallet *et al* [18]  
650 resulted in this efficacious method for DNA isolation from a large quantity of faecal material.  
651 The amplification success of mtDNA was found to be similar regardless of whether faecal  
652 material was sampled from the outer surface or inner core of a stool. However, the period to  
653 which faeces were exposed to the environment had significant impacts on amplification  
654 success of nDNA markers. Although the amplification success of mtDNA was adequate with  
655 the QIAamp method, the use of HV-CTAB-PCI resulted in improvements, especially for  
656 eroded faeces (*in*-EE-L5). Regardless of the method used, nuclear markers amplified better in  
657 fresher faeces than eroded ones. Therefore, the hypothesis suggesting that QIAamp method  
658 would enable both mtDNA and nDNA amplifications when sampling from a stool’s outer  
659 surface was rejected; the hypothesis suggesting increased efficacy of amplification in fresher  
660 faeces was supported by these results.

661

## 662 **Development of HV-CTAB-PCI method**

663 The HV-CTAB-PCI method developed in this study was cost-effective, user-friendly,  
664 and highly efficacious at isolating sufficient quantity and quality of dugong DNA from scats.

665 Although mtDNA amplification was highly successful using DNA extracted following the  
666 QIAamp protocol, ZFX amplification was inconsistent, even for fresh faecal samples. This  
667 contrasts with Takoukam Kamla's [32] results showing that the QIAamp protocol enabled  
668 amplifications of both microsatellites and mtDNA from manatee scats. In his study, pre-  
669 amplification enhanced the amount of manatee DNA that was originally extracted, thus  
670 improving the subsequent PCRs for nDNA amplification. However, pre-amplification in pilot  
671 experiments (including touchdown protocol) conducted in this study yielded no ZFX (nDNA)  
672 amplifications in the final PCRs. This may suggest that there is only a scant amount of DNA  
673 in dugong faeces. If the amount of dugong DNA originally extracted was of a negligible  
674 proportion compared to the robust quantities of exogenous DNA, then such a dilute presence  
675 of dugong DNA would render an infinitesimal probability that dugong DNA is pipetted into  
676 each well of the PCR plates [55]. If no dugong DNA was pipetted into the PCR reactions,  
677 then pre-amplification would not increase the quantity of target DNA, thus resulting in non-  
678 amplification of target DNA in subsequent PCRs. Another notable contributor to Takoukam  
679 Kamla's success was likely the addition of a purification step post-DNA isolation, removing  
680 PCR inhibitors that may have been co-extracted with the DNA [32]. However, the consistent  
681 amplification of dugong mtDNA and results from dilution experiments performed in this  
682 study showed only low levels of PCR inhibition. Consequently, an additional purification  
683 step was not utilised in this study, in an attempt to minimise DNA loss [56]. Furthermore, this  
684 study showed a positive correlation between concentration of total DNA extracted and PCR  
685 success. This again hinted at a problem of scarcity of DNA in dugong faeces rather than  
686 issues of PCR inhibitors. As dugongs feed on a more restricted diet [35] compared to  
687 manatees [33], it is possible that there are fewer and less diverse plant secondary metabolites  
688 (e.g., tannins) to inhibit PCR in dugong faeces. Additionally, unlike the open ocean where  
689 dugongs are found, the estuarine and freshwater water bodies that manatees inhabit often

690 contain high concentrations of tannins due to the decomposition of plant material from the  
691 surrounding forests and mangroves. Furthermore, the surface of dugong faeces is generally  
692 smoother and less fibrous than that of manatees. This may affect the relative quantity of  
693 epithelial cells found within dugong faeces, as the rougher, harder scats of manatees may  
694 stimulate more mucus secretion that entraps exfoliated cells [13].

695         A simple way to increase total DNA extracted from faeces is to increase the total  
696 amount of faecal material used for DNA extraction. This study utilised 220 mg of dugong  
697 faeces for DNA extraction with the QIAamp protocol as this is the maximum amount  
698 recommended by the manufacturer. Despite the retention of a higher volume of supernatant  
699 that contains DNA and the increase in subsequent volumes of extraction buffers used, this  
700 method did not isolate sufficient target DNA for consistent ZFX amplification in this study.  
701 Takoukam Kamla [32] managed to use a slightly larger amount (300 – 1260 mg) of manatee  
702 faeces without increasing the volumes of any reagents used. However, that might have  
703 contributed to the lower purity of those DNA extracts since there may have been insufficient  
704 reagents to efficiently clean and protect the extracted DNA, making an extra purification step  
705 essential. Since target DNA insufficiency was a problem in this study, the HV-CTAB-PCI  
706 method was developed to enable a more economical higher volume extraction of faeces. This  
707 method was modified from Vallet *et al's* [18] 2CTAB/PCI protocol that was successful in  
708 extracting DNA from faeces of herbivorous primates. As the reagents used were self-  
709 prepared and the function of each chemical was known, this new method provided the  
710 flexibility to modify usage and concentrations of any reagents to suit DNA extraction from  
711 dugong faeces.

712         This novel HV-CTAB-PCI method is markedly different to the 2CTAB/PCI  
713 approach. The minimum effective sample-to-reagent ratio used in this method (1:5) was first  
714 determined through a 1 mL-by-1 mL addition of Lysis Buffer 1 to 1 g of faecal sample. This



715 differs from the ratios used in the 2CTAB/PCI approach [18], which would require large  
716 volumes of reagents, when scaled up, to extract DNA from 1 g of faeces. Instead of an  
717 overnight incubation, cell lysis duration was reduced to 3 h to shorten the DNA extraction  
718 procedure. To separate DNA from proteins and other impurities, an effective equal PCI-to-  
719 supernatant ratio (1:1) was utilised [57]. Proteins were digested using protease instead of the  
720 widely used Proteinase K in the HV-CTAB-PCI method as protease was found to be effective  
721 at removing proteins, and costs less than the latter enzyme. As the presence of RNA did not  
722 present problems in PCR amplifications, RNase was not used in this newly developed  
723 protocol. To minimise DNA loss, the DNA pellet retrieved at the end of extraction was  
724 washed once only [56]. Despite a reduced washing frequency, PCR was not significantly  
725 inhibited and the amplification successes of mtDNA and ZFX were higher using this new  
726 protocol compared to the QIAamp method. This again showed that PCR inhibitors were  
727 unlikely to be a major issue within dugong faeces.

728

## 729 **Sampling from different layers of faeces of varying quality**

730         Amplification success and relative quantity of mtDNA did not differ between DNA  
731 extracted from the outer surface and inner core of dugong stools. This result was surprising as  
732 faecal DNA extractions in most molecular scatology studies have sampled the outer surface  
733 of a scat only, e.g., [8,14]. This study concurs with Stenglein *et al* [58] which found no  
734 difference in PCR success and error rates of DNA extracted from outer and inner layers of  
735 brown bear scats. Although lower allelic dropout and higher genotyping success rates were  
736 achieved when DNA from the outer surface of stools was used [58], it would be improper to  
737 conclude that most of the target animal cells are located on the outer surface as those  
738 measures only reflect the quality of DNA extracted. As the total DNA yield tended to be

739 higher when outer surface was sampled, it is possible that the small sample size (total n= 32)  
740 in this study limited the detection of significance between outer and inner layers of faecal  
741 stools. However, it is likely that most of the DNA extracted was from organisms that were  
742 not of interest (e.g., bacteria, plants) since the relative amount of dugong mtDNA was the  
743 same regardless of layers sampled. Instead, we hypothesise that the target animal cells and  
744 therefore their DNA would be heterogeneously distributed throughout the faecal mass. Since  
745 faeces are unformed in the upper regions of the colon, exfoliated epithelial cells from those  
746 regions would likely be incorporated within the faecal mass through peristaltic contractions  
747 of the colon [12,59].

748         The degree to which voided dugong faeces were exposed to the environment was  
749 found to significantly influence amplification success and relative amount of recovered DNA.  
750 Comparing mtDNA amplifications, highly eroded stools were found to amplify poorly  
751 compared to fresher ones. Eroded faeces were anticipated to amplify poorly as DNA degrades  
752 over time [60]. Epithelial cells undergo apoptosis as they detach from the basement  
753 membrane [61], where enzymes that degrade DNA break down the phosphodiester bonds that  
754 form the backbone of DNA [62]. This breaks the DNA into progressively shorter fragments  
755 and eventually into nucleotides [62]. The new HV-CTAB-PCI method, however, greatly  
756 improved mtDNA amplification, allowing consistent amplification even in eroded faecal  
757 samples. As faecal DNA is often highly degraded, the extraction of DNA from a larger  
758 amount of faecal material, used in the HV-CTAB-PCI method, can increase the chance for  
759 more target DNA of sufficient length or quality to be extracted, thus allowing for a higher  
760 amplification success. As such, this newly developed DNA extraction method also enabled  
761 the comparison of ZFX amplifications in faeces of different environmental exposure levels  
762 (EELs). The amplification of ZFX marker was found to be highest in freshest faeces (*ex-EE-*  
763 *L1*) compared to older ones. Interestingly, the amplification success and relative quantity of

764 mtDNA were found to be higher in fresh *in-ōceanum* faeces (*in-EE-L3*) compared to the *ex-*  
765 *ōceanum* faeces (*ex-EE-L1*), in contrast to what one might expect. The amount of amplifiable  
766 target DNA is influenced by the physical loss and chemical degradation (e.g., fragmentation)  
767 of DNA. Although the loss of target DNA could be higher when faeces is transported in the  
768 ocean, sea salts such as  $\text{Ca}^{2+}$  and  $\text{Mg}^{2+}$ , which DNA has a higher affinity for compared to  $\text{Na}^{+}$   
769 [63,64], may help to stabilise or preserve the integrity of DNA [64,65,66]. Therefore, the  
770 higher relative quantity of mtDNA in *in-EE-L3* faeces may be due to preservative effects of  
771 salt. However, the higher DNA loss in *in-EE-L4* and *L5* faeces may have outweighed any  
772 preservative effects on DNA, leading to the observed results. Although it remains unknown  
773 why the ZFX amplifications failed to reproduce the same trend, it is possible that the  
774 structural differences (circular versus linear) or the cellular location of mtDNA versus nDNA  
775 may have influenced their degradative vulnerability [67].

776         Although this study achieved a low amplification success in more eroded faeces, the  
777 chance of success may be enhanced by scaling up the amount of starting faecal material used  
778 for DNA extraction. If that fails, separation of host DNA from bacterial DNA could be  
779 trialled using the host-DNA enrichment method by Chiou and Bergey [68] as this may  
780 improve the purity of DNA extracted. However, whole genome amplification may need to be  
781 performed prior to enrichment if the amount of target DNA extracted is insufficient for an  
782 efficient separation. Alternatively, host epithelial cells could be separated from a large  
783 proportion or the entire faecal mass using the methodology developed by Matsushita et al.  
784 [69] and DNA extraction could then be directly performed on those cells.

785

## 786 **SNP amplifications using faecal DNA**

787           This study showed a proof-of-concept for the potential utilisation of faecal DNA in  
788 population genetic studies of dugongs, as all ten SNPs were successfully amplified using the  
789 dugong faecal DNA extracted with the new HV-CTAB-PCI method. The SNP primers did  
790 not significantly influence amplification success, but interestingly, primers Dug12 and Dug63  
791 amplified less than other SNP primers. One plausible explanation is that those target sites  
792 may be more sensitive to DNA degradation. For example, Johnston *et al* [70] showed that  
793 regions where SNP markers showed polyploidy due to historical genome duplication in  
794 Atlantic salmon had higher sensitivity to DNA degradation and thus had lower genotyping  
795 success. Alternatively, the primers used in this study that were designed for those target sites  
796 may not have been optimal. The impact of DNA degradation was also reflected in SNP  
797 amplifications as fresh faeces amplified more successfully than eroded ones. Since SNP  
798 amplicons are generally shorter than microsatellites [30], the difficulty for SNP amplification  
799 in eroded faeces may indicate that the DNA extracted from these faeces was too degraded or  
800 fragmented for primers to bind and amplify at the target site. That said, only one SNP marker  
801 (Dug54) was used to compare the amplification success between faeces of different EELs  
802 which limits the extent of inferences that can be made.

803

## 804 **Conclusion**

805           This research has successfully pioneered a novel DNA extraction protocol (HV-  
806 CTAB-PCI) for an herbivorous marine mammal, the dugong, and has demonstrated the most  
807 efficient sampling methodologies to maximise retrieval of target DNA from faecal samples,  
808 to enable amplification of both mitochondrial and nuclear markers used in genetic population  
809 studies. This study also provided a preliminary idea on the distribution of sloughed epithelial  
810 cells and thus target DNA within faecal stools, which may help researchers increase the

811 efficiency and success for target DNA recovery. The main limitation of this research was the  
812 inability to isolate DNA of sufficient quality from the oldest, most eroded stools for  
813 amplification of target nDNA. Despite that, multiple suggestions have been made to increase  
814 the chances for DNA retrieval. As the first study to demonstrate consistent amplification of  
815 nDNA from dugong faeces, the development of the HV-CTAB-PCI method will facilitate  
816 non-invasive genetic studies in areas where direct sampling is unfeasible. For instance, faecal  
817 samples have been collected from some remote and turbid water regions in northern  
818 Queensland where dugongs could not be sampled directly. These samples may now be  
819 analysed to gain a fuller understanding on the population structure of dugongs along the  
820 entire eastern Queensland coast. Future application of this approach could include broad-  
821 scale population genetic studies on dugongs throughout the Indo-Pacific region where  
822 resources for direct sampling are typically unavailable but obtaining samples for genetic  
823 analysis is critical.

824

## 825 **Acknowledgements**

826 Thanks to the UQ Dugong Team for assistance in sample collection, especially Helen  
827 Peereboom. Morgan McCarthy provided SNP amplicon sequences, Jennifer Seddon advised  
828 on SNP analysis, Simone Blomberg advised on statistics, while Seth and Matthew Kazmer  
829 assisted with hand-drawn illustrations. Any use of trade, firm, or product names is for  
830 descriptive purposes only and does not imply endorsement by the U.S. Government.

831

## 832 **References**

833 1. García-Dorado A, Caballero A. Neutral genetic diversity as a useful tool for

- 834 conservation biology. *Conserv Genet.* 2021;22: 541–5. <https://doi.org/10.1007/s10592->  
835 021-01384-9
- 836 2. Kardos M, Armstrong EE, Fitzpatrick SW, Hauser S, Hedrick PW, Miller JM, et al.  
837 The crucial role of genome-wide genetic variation in conservation. *Proc Natl Acad Sci*  
838 U S A. 2021;118(48): e2104642118. <https://doi.org/10.1073/pnas.2104642118>.
- 839 3. Frankham R. Genetics and extinction. *Biol Conserv.* 2005;126(2): 131–40.  
840 <https://doi.org/10.1016/j.biocon.2005.05.002>.
- 841 4. Wong P, Wiley EO, Johnson WE, Ryder OA, O’Brien SJ, Haussler D, et al. Tissue  
842 sampling methods and standards for vertebrate genomics. *Gigascience.* 2012;1: 2047-  
843 217X. <https://doi.org/10.1186/2047-217X-1-8>.
- 844 5. Fernando P, Vidya TNC, Rajapakse C, Dangolla A, Melnick DJ. Reliable noninvasive  
845 genotyping: Fantasy or reality? *J Hered.* 2003;94(2): 115–23.  
846 <https://doi.org/10.1093/jhered/esg022>.
- 847 6. Taberlet P, Luikart G, Waits LP. Noninvasive genetic sampling: Look before you leap.  
848 *Trends Ecol Evol.* 1999;14(8): 323–7. [https://doi.org/10.1016/S0169-5347\(99\)01637-](https://doi.org/10.1016/S0169-5347(99)01637-)  
849 7.
- 850 7. Boston ESM, Puechmaille SJ, Scott DD, Buckley DJ, Lundy MG, Montgomery IW, et  
851 al. Empirical assessment of non-invasive population genetics in bats: Comparison of  
852 DNA quality from faecal and tissue samples. *Acta Chiropt.* 2012;14(1): 45–52.  
853 <https://doi.org/10.3161/150811012X654259>.
- 854 8. Ramón-Laca A, Soriano L, Gleeson D, Godoy JA. A simple and effective method for  
855 obtaining mammal DNA from faeces. *Wildlife Biol.* 2015;21(4): 195–203.  
856 <https://doi.org/10.2981/wlb.00096>.
- 857 9. Schrader C, Schielke A, Ellerbroek L, John R. PCR inhibitors - occurrence, properties  
858 and removal. *J Appl Microbiol.* 2012;113(5): 1014–26. <https://doi.org/10.1111/j.1365->

- 859 2672.2012.05384.x.
- 860 10. Gillett RM, White BN, Rolland RM. Quantification and genetic profiling of DNA  
861 isolated from free-floating feces of the North Atlantic right whale (*Eubalaena*  
862 *glacialis*). Mar Mammal Sci. 2008;24(2): 341–55. [https://doi.org/10.1111/j.1748-](https://doi.org/10.1111/j.1748-7692.2008.00192.x)  
863 [7692.2008.00192.x](https://doi.org/10.1111/j.1748-7692.2008.00192.x).
- 864 11. Zhang M, Wei M, Dong Z, Duan H, Mao S, Feng S, et al. Fecal DNA isolation and  
865 degradation in clam *Cyclina sinensis*: Noninvasive DNA isolation for conservation and  
866 genetic assessment. BMC Biotechnol. 2019;19(1): 4–11.  
867 <https://doi.org/10.1186/s12896-019-0595-6>.
- 868 12. Ryan L, Wong YT, Dwyer KM, Clarke D, Kyprian L, Craig JM. Coprocytobiology: a  
869 technical review of cytological colorectal cancer screening in fecal samples. SLAS  
870 Technol. 2021;26(6): 591–604. <https://doi.org/10.1177/24726303211024562>.
- 871 13. White V, Scarpini C, Barbosa-Morais NL, Ikelle E, Carter S, Laskey RA, et al.  
872 Isolation of stool-derived mucus provides a high yield of colonocytes suitable for early  
873 detection of colorectal carcinoma. Cancer Epidemiol Biomarkers Prev. 2009;18(7):  
874 2006–13. <https://doi.org/10.1158/1055-9965.EPI-08-1145>.
- 875 14. Rutledge LY, Holloway JJ, Patterson BR, White BN. An improved field method to  
876 obtain DNA for individual identification from wolf scat. J Wildl Manage. 2009;73(8):  
877 1430–5. <https://doi.org/10.2193/2008-492>.
- 878 15. Tende T, Hansson B, Ottosson U, Bensch S. Evaluating preservation medium for the  
879 storage of DNA in African lion *Panthera leo* faecal samples. Curr Zool. 2014;60(3):  
880 351–8. <https://doi.org/10.1093/czoolo/60.3.351>.
- 881 16. Parsons KM. Reliable microsatellite genotyping of dolphin DNA from faeces. Mol  
882 Ecol Notes. 2001;1(4): 341–4. <https://doi.org/10.1046/j.1471-8278.2001.00098.x>.
- 883 17. Green ML, Herzing DL, Baldwin JD. Noninvasive methodology for the sampling and

- 884 extraction of DNA from free-ranging Atlantic spotted dolphins (*Stenella frontalis*).  
885 Mol Ecol Notes. 2007;7(6): 1287–92. <https://doi.org/10.1111/j.1471->  
886 8286.2007.01858.x.
- 887 18. Vallet D, Petit EJ, Gatti S, Levréro F, Ménard N. A new 2CTAB/PCI method  
888 improves DNA amplification success from faeces of Mediterranean (*Barbary*  
889 *macaques*) and tropical (lowland gorillas) primates. Conserv Genet. 2008;9(3): 677–  
890 80. <https://doi.org/10.1007/s10592-007-9361-8>.
- 891 19. Marsh H, Sobtzick S. *Dugong dugon* (amended version of 2015 assessment). IUCN  
892 Red List Threat Species. 2019;8235: eT6909A160756767.  
893 <https://dx.doi.org/10.2305/IUCN.UK.2015-4.RLTS.T6909A160756767.en>
- 894 20. Plön S, Thakur V, Parr L, Lavery SD. Phylogeography of the dugong (*Dugong dugon*)  
895 based on historical samples identifies vulnerable Indian Ocean populations. PLoS One.  
896 2019;14(9): 1–19. <https://doi.org/10.1371/journal.pone.0219350>.
- 897 21. Tikel D. Using a genetic approach to optimise dugong (*Dugong dugon*) conservation  
898 management. PhD Thesis, James Cook University. 1997. Available from:  
899 <http://researchonline.jcu.edu.au/28125/>
- 900 22. Marsh H, OShea TJ, Reynolds III JE. Ecology and conservation of the Sirenia. Vol.  
901 18. Cambridge: Cambridge University Press; 2011. pp. 327–393. Available from:  
902 <http://ebooks.cambridge.org/ref/id/CBO9781139013277>
- 903 23. Kayanne H, Hara T, Arai N, Yamano H, Matsuda H. Trajectory to local extinction of  
904 an isolated dugong population near Okinawa Island, Japan. Sci Reports. 2022  
905 Apr;12(1): 1–8. Available from: <https://www.nature.com/articles/s41598-022-09992-2>
- 906 24. McDonald B. Population genetics of dugongs around Australia: Implications of gene  
907 flow and migration. PhD Thesis, The University of Queensland. 2005.
- 908 25. Harrison RG. Animal mitochondrial DNA as a genetic marker in population and



- 909 evolutionary biology. *Trends Ecol Evol.* 1989;4(1): 6–11.  
910 [https://doi.org/10.1016/0169-5347\(89\)90006-2](https://doi.org/10.1016/0169-5347(89)90006-2).
- 911 26. Seddon JM, Ovenden JR, Sneath HL, Broderick D, Dudgeon CL, Lanyon JM. Fine  
912 scale population structure of dugongs (*Dugong dugon*) implies low gene flow along  
913 the southern Queensland coastline. *Conserv Genet.* 2014;15(6): 1381–92.  
914 <https://doi.org/10.1007/s10592-014-0624-x>.
- 915 27. McGowan A. Ecological genetics of dugongs (*Dugong dugon*) in Queensland. PhD  
916 Thesis, The University of Queensland. 2019.
- 917 28. Brookes AJ. The essence of SNPs. *Gene.* 1999;234(2): 177–86.  
918 [https://doi.org/10.1016/S0378-1119\(99\)00219-X](https://doi.org/10.1016/S0378-1119(99)00219-X).
- 919 29. Morin PA, Luikart G, Wayne RK. SNPs in ecology, evolution and conservation.  
920 *Trends Ecol Evol.* 2004;19(4): 208–16. <https://doi.org/10.1016/j.tree.2004.01.009>.
- 921 30. Freire-Aradas A, Fondevila M, Kriegel AK, Phillips C, Gill P, Prieto L, et al. A new  
922 SNP assay for identification of highly degraded human DNA. *Forensic Sci Int Genet.*  
923 2012;6(3): 341–9. <http://dx.doi.org/10.1016/j.fsigen.2011.07.010>
- 924 31. Andréasson H, Nilsson M, Budowle B, Lundberg H, Allen M. Nuclear and  
925 mitochondrial DNA quantification of various forensic materials. *Forensic Sci Int.*  
926 2006;164(1): 56–64. <https://doi.org/10.1016/j.forsciint.2005.11.024>.
- 927 32. Takoukam Kamla A. Genetic diversity, diet, and habitat quality of the African manatee  
928 (*Trichechus senegalensis*) in the downstream of the Sanaga River watershed,  
929 Cameroon. PhD Thesis, University Of Florida. 2019.
- 930 33. Castelblanco-Martínez DN, Morales-Vela B, Hernández-Arana HA, Padilla-Saldivar J.  
931 Diet of the manatees (*Trichechus manatus manatus*) in Chetumal Bay, Mexico. *Lat*  
932 *Am J Aquat Mamm.* 2009;7(1–2): 39-46. <https://doi.org/10.5597/lajam00132>.
- 933 34. Lanyon JM. The nutritional ecology of the dugong in tropical north Queensland. PhD

- 934 Thesis, Monash and James Cook University. 1991.
- 935 35. Lanyon JM, Sanson GD. Mechanical disruption of seagrass in the digestive tract of the  
936 dugong. *J Zool.* 2006;270(2): 277–89. [https://doi.org/10.1111/j.1469-](https://doi.org/10.1111/j.1469-7998.2006.00135.x)  
937 [7998.2006.00135.x](https://doi.org/10.1111/j.1469-7998.2006.00135.x).
- 938 36. Murray RM, Marsh H, Heinsohn GE, Spain AV. The role of the midgut caecum and  
939 large intestine in the digestion of sea grasses by the dugong (Mammalia: Sirenia).  
940 *Comp Biochem Physiol -- Part A Physiol.* 1977;56(1): 7–10.  
941 [https://doi.org/10.1016/0300-9629\(77\)90432-7](https://doi.org/10.1016/0300-9629(77)90432-7).
- 942 37. Best RC. Foods and feeding habits of wild and captive Sirenia. *Mamm Rev.*  
943 1981;11(1): 3–29. <https://doi.org/10.1111/j.1365-2907.1981.tb00243.x>.
- 944 38. Lanyon JM, Sneath HL, Long T, Bonde RK. Physiological response of wild dugongs  
945 (*Dugong dugon*) to out-of-water sampling for health assessment. *Aquat Mamm.*  
946 2010;36(1): 46–58. <https://doi.org/10.1578/AM.36.1.2010.46>.
- 947 39. Lanyon JM, Sneath HL, Kirkwood JM, Slade RW. Establishing a mark-recapture  
948 program for dugongs in Moreton Bay, south-east Queensland. *Aust Mammal.*  
949 2002;24(1): 51–6. <https://doi.org/10.1071/AM02051>.
- 950 40. Tol SJ, Harrison M, Groom R, Gilbert J, Blair D, Coles R, et al. Using DNA to  
951 distinguish between faeces of *Dugong dugon* and *Chelonia mydas*: non-invasive  
952 sampling for IUCN-listed marine megafauna. *Conserv Genet Resour.* 2021;13(2):  
953 115–7. <https://doi.org/10.1007/s12686-020-01187-z>
- 954 41. McHale M, Broderick D, Ovenden JR, Lanyon JM. A PCR assay for gender  
955 assignment in dugong (*Dugong dugon*) and West Indian manatee (*Trichechus*  
956 *manatus*). *Mol Ecol Resour.* 2008;8(3): 669–70. [https://doi.org/10.1111/j.1471-](https://doi.org/10.1111/j.1471-8286.2007.02041.x)  
957 [8286.2007.02041.x](https://doi.org/10.1111/j.1471-8286.2007.02041.x).
- 958 42. Ruijter JM, Ramakers C, Hoogaars WMH, Karlen Y, Bakker O, van den hoff MJB, et

- 959 al. Amplification efficiency: Linking baseline and bias in the analysis of quantitative  
960 PCR data. *Nucleic Acids Res.* 2009;37(6): e45. <https://doi.org/10.1093/nar/gkp045>.
- 961 43. McCarthy M. Reading the bones - how archived skulls can inform temporal genetic  
962 variation in central Queensland's dugong population. PhD Thesis, The University of  
963 Queensland. 2018.
- 964 44. Tamura K, Stecher G, Kumar S. MEGA11: molecular evolutionary genetics analysis  
965 Version 11. *Mol Biol Evol.* 2021;38(7): 3022–3027.  
966 <https://doi.org/10.1093/molbev/msab120>.
- 967 45. R Core Team. R: A language and environment for statistical computing. R Foundation  
968 for Statistical Computing. 2020. <https://www.R-project.org/>
- 969 46. Wickham H. *ggplot2: Elegant graphics for data analysis*. In: Springer-Verlag. New  
970 York. 2016.
- 971 47. Rudis B. *hrbrthemes: Additional themes, theme components and utilities for 'ggplot2'*.  
972 R package version 0.8.0. 2020. <https://CRAN.R-project.org/package=hrbrthemes>.
- 973 48. Hope RM. *Rmisc: Ryan miscellaneous*. R package version 1.5.1. 2022.  
974 <https://CRAN.R-project.org/package=Rmisc>.
- 975 49. Aphalo P. *ggpmisc: Miscellaneous extensions to 'ggplot2'*. R package version 0.4.7.  
976 2022. <https://CRAN.R-project.org/package=ggpmisc>.
- 977 50. Ahlmann-Eltze C, Patil I. *ggsignif: R package for displaying significance brackets for*  
978 *'ggplot2'*. *PsyArxiv*. 2021. doi:10.31234/osf.io/7awm6
- 979 51. Kassambara A. *ggpubr: 'ggplot2' based publication ready plots*. R package version  
980 0.4.0. 2020. <https://CRAN.R-project.org/package=ggpubr>.
- 981 52. Pinheiro J, Bates D, R Core Team. *nlme: Linear and nonlinear mixed effects models*. R  
982 package version 3. 2022; 1-157. <https://CRAN.R-project.org/package=nlme>.
- 983 53. Venables WN, Ripley BD. *Modern applied statistics with S*. 4<sup>th</sup> ed. New York:

- 984 Springer; 2002.
- 985 54. Kosmidis I. brglm2: Bias reduction in generalized linear models. R package version  
986 0.8.2. 2021. <https://CRAN.R-project.org/package=brglm2>.
- 987 55. Taberlet P, Griffin S, Goossens B, Questiau S, Manceau V, Escaravage N, et al.  
988 Reliable genotyping of samples with very low DNA quantities using PCR. *Nucleic  
989 Acids Res.* 1996;24(16): 3189–94. <https://doi.org/10.1093/nar/24.16.3189>.
- 990 56. Guo W, Jiang L, Bhasin S, Khan SM, Swerdlow RH. DNA extraction procedures  
991 meaningfully influence qPCR-based mtDNA copy number determination.  
992 *Mitochondrion.* 2009;9(4): 261–5. <https://doi.org/10.1016/j.mito.2009.03.003>.
- 993 57. Green MR, Sambrook J. Isolation of high-molecular-weight DNA using organic  
994 solvents. *Cold Spring Harb Protoc.* 2017;4: 356–9.  
995 <https://doi.org/10.1101/pdb.prot093450>.
- 996 58. Stenglein JL, De Barba M, Ausband DE, Waits LP. Impacts of sampling location  
997 within a faeces on DNA quality in two carnivore species. *Mol Ecol Resour.*  
998 2010;10(1): 109–14. <https://doi.org/10.1111/j.1755-0998.2009.02670.x>.
- 999 59. Ahlquist DA, Harrington JJ, Burgart LJ, Roche PC. Morphometric analysis of the  
1000 “mucocellular layer” overlying colorectal cancer and normal mucosa: relevance to  
1001 exfoliation and stool screening. *Hum Pathol.* 2000;31(1): 51–7.  
1002 [https://doi.org/10.1016/S0046-8177\(00\)80198-7](https://doi.org/10.1016/S0046-8177(00)80198-7).
- 1003 60. Piggott MP. Effect of sample age and season of collection on the reliability of  
1004 microsatellite genotyping of faecal DNA. *Wildl Res.* 2004;31(5): 485–93.  
1005 <https://doi.org/10.1071/WR03096>.
- 1006 61. Strater J, Wedding U, Barth TFE, Koretz K, Elsing C, Moller P. Rapid onset of  
1007 apoptosis in vitro follows disruption of  $\beta$ 1- integrin/matrix interactions in human  
1008 colonic crypt cells. *Gastroenterology.* 1996;110(6): 1776–84.

- 1009 <https://doi.org/10.1053/gast.1996.v110.pm8964403>.
- 1010 62. Kawane K, Motani K, Nagata S. DNA degradation and its defects. Cold Spring Harb  
1011 Perspect Biol. 2014;6(6): 1–14. <https://doi.org/10.1101/cshperspect.a016394>.
- 1012 63. Korolev N, Lyubartsev AP, Rupprecht A, Nordenskiöld L. Competitive binding of  
1013  $Mg^{2+}$ ,  $Ca^{2+}$ ,  $Na^{+}$ , and  $K^{+}$  ions to DNA in oriented DNA fibers: Experimental and  
1014 Monte Carlo simulation results. Biophys J. 1999;77(5): 2736–49.  
1015 [https://doi.org/10.1016/S0006-3495\(99\)77107-9](https://doi.org/10.1016/S0006-3495(99)77107-9).
- 1016 64. Sigel RKO, Sigel H. A stability concept for metal ion coordination to single-stranded  
1017 nucleic acids and affinities of individual sites. Acc Chem Res. 2010;43(7): 974–84.  
1018 <https://doi.org/10.1021/ar900197y>.
- 1019 65. Shved N, Haas C, Papageorgopoulou C, Akguel G, Paulsen K, Bouwman A, et al. Post  
1020 mortem DNA degradation of human tissue experimentally mummified in salt. PLoS  
1021 One. 2014;9(10): e110753. <https://doi.org/10.1371/journal.pone.0110753>.
- 1022 66. Cruz-León S, Vanderlinden W, Müller P, Forster T, Staudt G, Lin YY, et al. Twisting  
1023 DNA by salt. Nucleic Acids Res. 2022;50(10): 5726–38.  
1024 <https://doi.org/10.1093/nar/gkac445>.
- 1025 67. Foran DR. Relative degradation of nuclear and mitochondrial DNA: An experimental  
1026 approach. J Forensic Sci. 2006;51(4): 766–70. <https://doi.org/10.1111/j.1556-4029.2006.00176.x>.
- 1027
- 1028 68. Chiou KL, Bergey CM. Methylation-based enrichment facilitates low-cost,  
1029 noninvasive genomic scale sequencing of populations from feces. Sci Rep.  
1030 2018;1975(8): 1–10. <https://doi.org/10.1038/s41598-018-20427-9>.
- 1031 69. Matsushita H, Matsumura Y, Moriya Y, Akasu T, Fujita S, Yamamoto S, et al. A new  
1032 method for isolating colonocytes from naturally evacuated feces and its clinical  
1033 application to colorectal cancer diagnosis. Gastroenterology. 2005;129(6): 1918–27.

1034 <https://doi.org/10.1053/j.gastro.2005.10.007>.

1035 70. Johnston SE, Lindqvist M, Niemelä E, Orell P, Erkinaro J, Kent MP, et al. Fish scales  
1036 and SNP chips: SNP genotyping and allele frequency estimation in individual and  
1037 pooled DNA from historical samples of Atlantic salmon (*Salmo salar*). BMC  
1038 Genomics. 2013;14(1): 1-13. <https://doi.org/10.1186/1471-2164-14-439>.

1039

## 1040 **Supporting information**

1041 **S1 Fig. Flowcharts summarising the experimental designs and approaches taken in this**  
1042 **study.**

1043 (A) The first stage of this study targeted the development of a DNA extraction protocol for  
1044 dugong faeces. (B) The second stage of this study assessed the influence of sampling between  
1045 outer surface and inner core of faeces, in addition to impacts of faecal environmental  
1046 exposure, on the amplification success of mtDNA and ZFX markers. (C) The final stage of  
1047 this study sought to amplify ten SNP markers to show a proof-of-concept that population  
1048 genetic markers used for genetic studies of dugongs can be amplified using their faecal DNA.  
1049 The impacts on amplification were compared between different *In-ōceanum* faeces.

1050

1051 **S2 Fig. Results from a pilot study conducted to determine initial amount of total DNA**  
1052 **(10 and 100 ng) to be added into qPCR assay for comparison of mtDNA amplification**  
1053 **between outer surface and inner core of faeces with different EELs.**

1054 (A) Stacked bar charts of PCR success for the different initial total DNA used. No difference  
1055 was found between the initial DNA amount used ( $\chi^2= 0.381$ ,  $p= 1.000$ ). (B) Violin plots

1056 incorporating box plots of triplicate success for the different initial total DNA. No difference  
1057 was found between the total DNA used (Kruskal-Wallis  $\chi^2= 0.804$ ,  $df= 1$ ,  $p= 0.370$ ).

1058

1059 **S3 Fig. Alignment of SNP sequences amplified using ten dugong SNP primers with two**  
1060 **forms of alleles known.**

1061 Three random samples were chosen to be shown in the plot for each primer set. (A) Primer  
1062 Dug12. (B) Primer Dug40. (C) Primer Dug50. (D) Primer Dug51. (E) Primer Dug53. (F)  
1063 Primer Dug54. (G) Primer Dug60. (H) Primer Dug62. (I) Primer Dug63. (J) Primer Dug64.

**A.** *Ex-ōceanum*— EE-Level 1

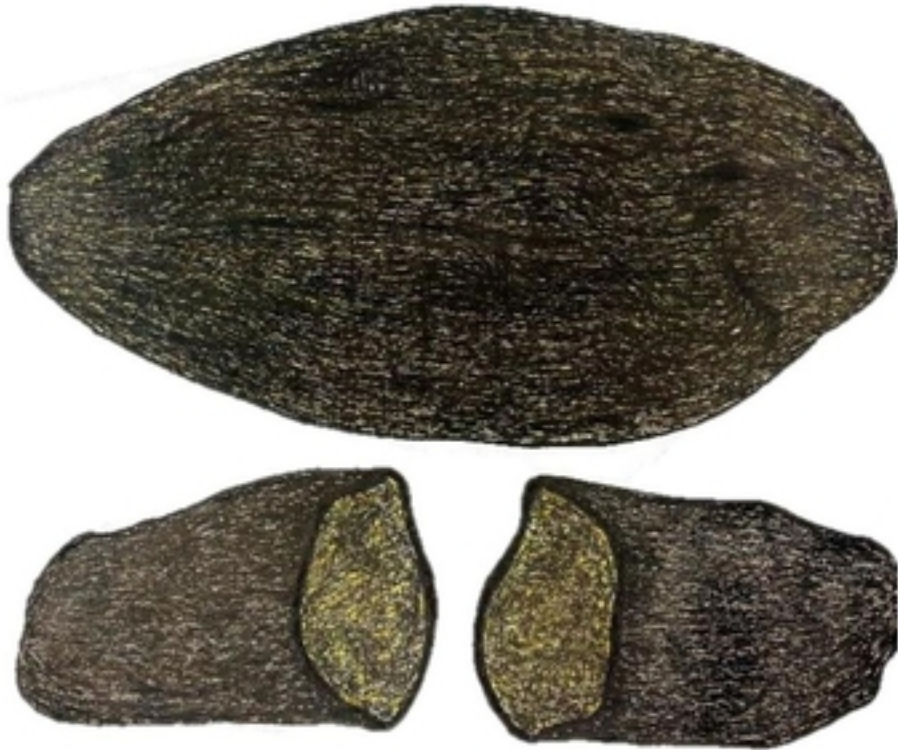

**B.** *In-ōceanum*— EE-Level 2 and 3

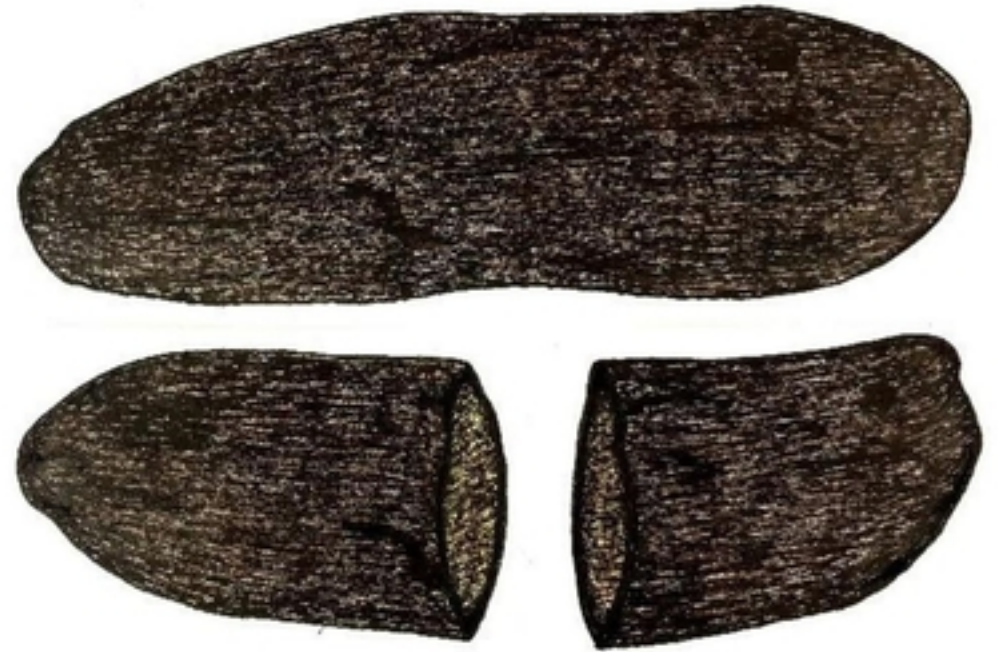

**C.** *In-ōceanum*— EE-Level 4

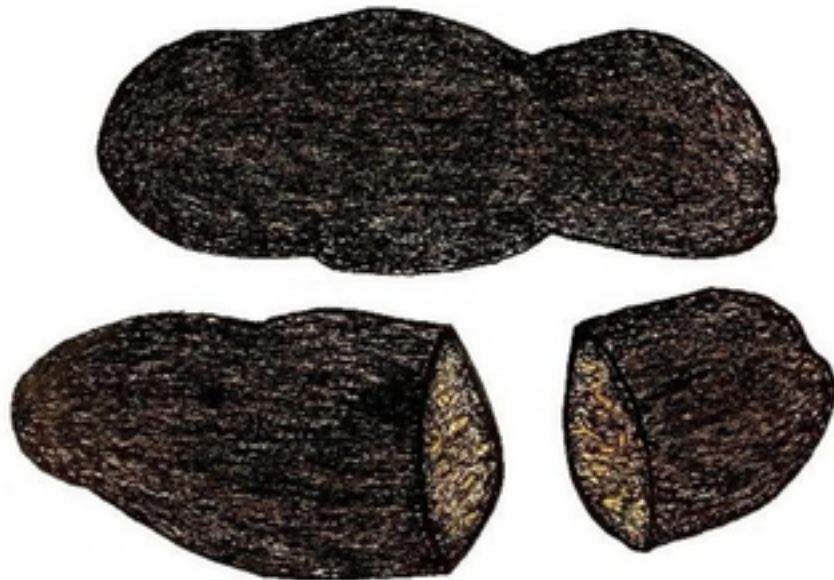

**D.** *In-ōceanum*— EE- Level 5

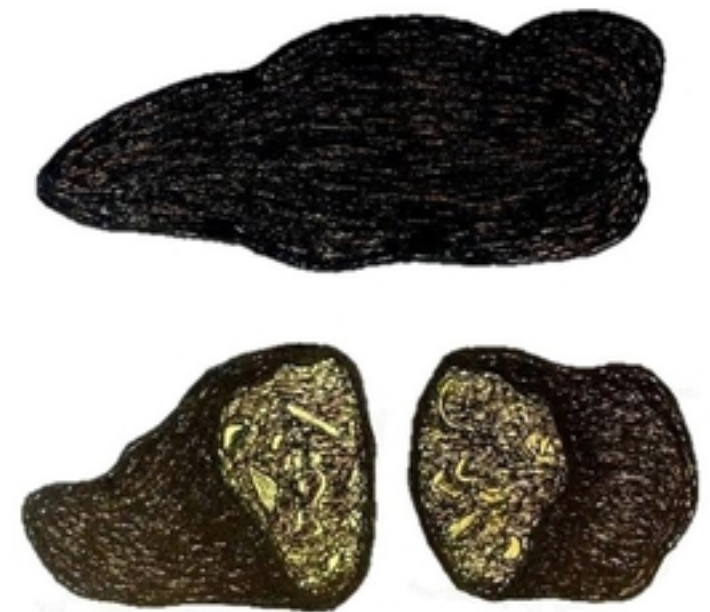



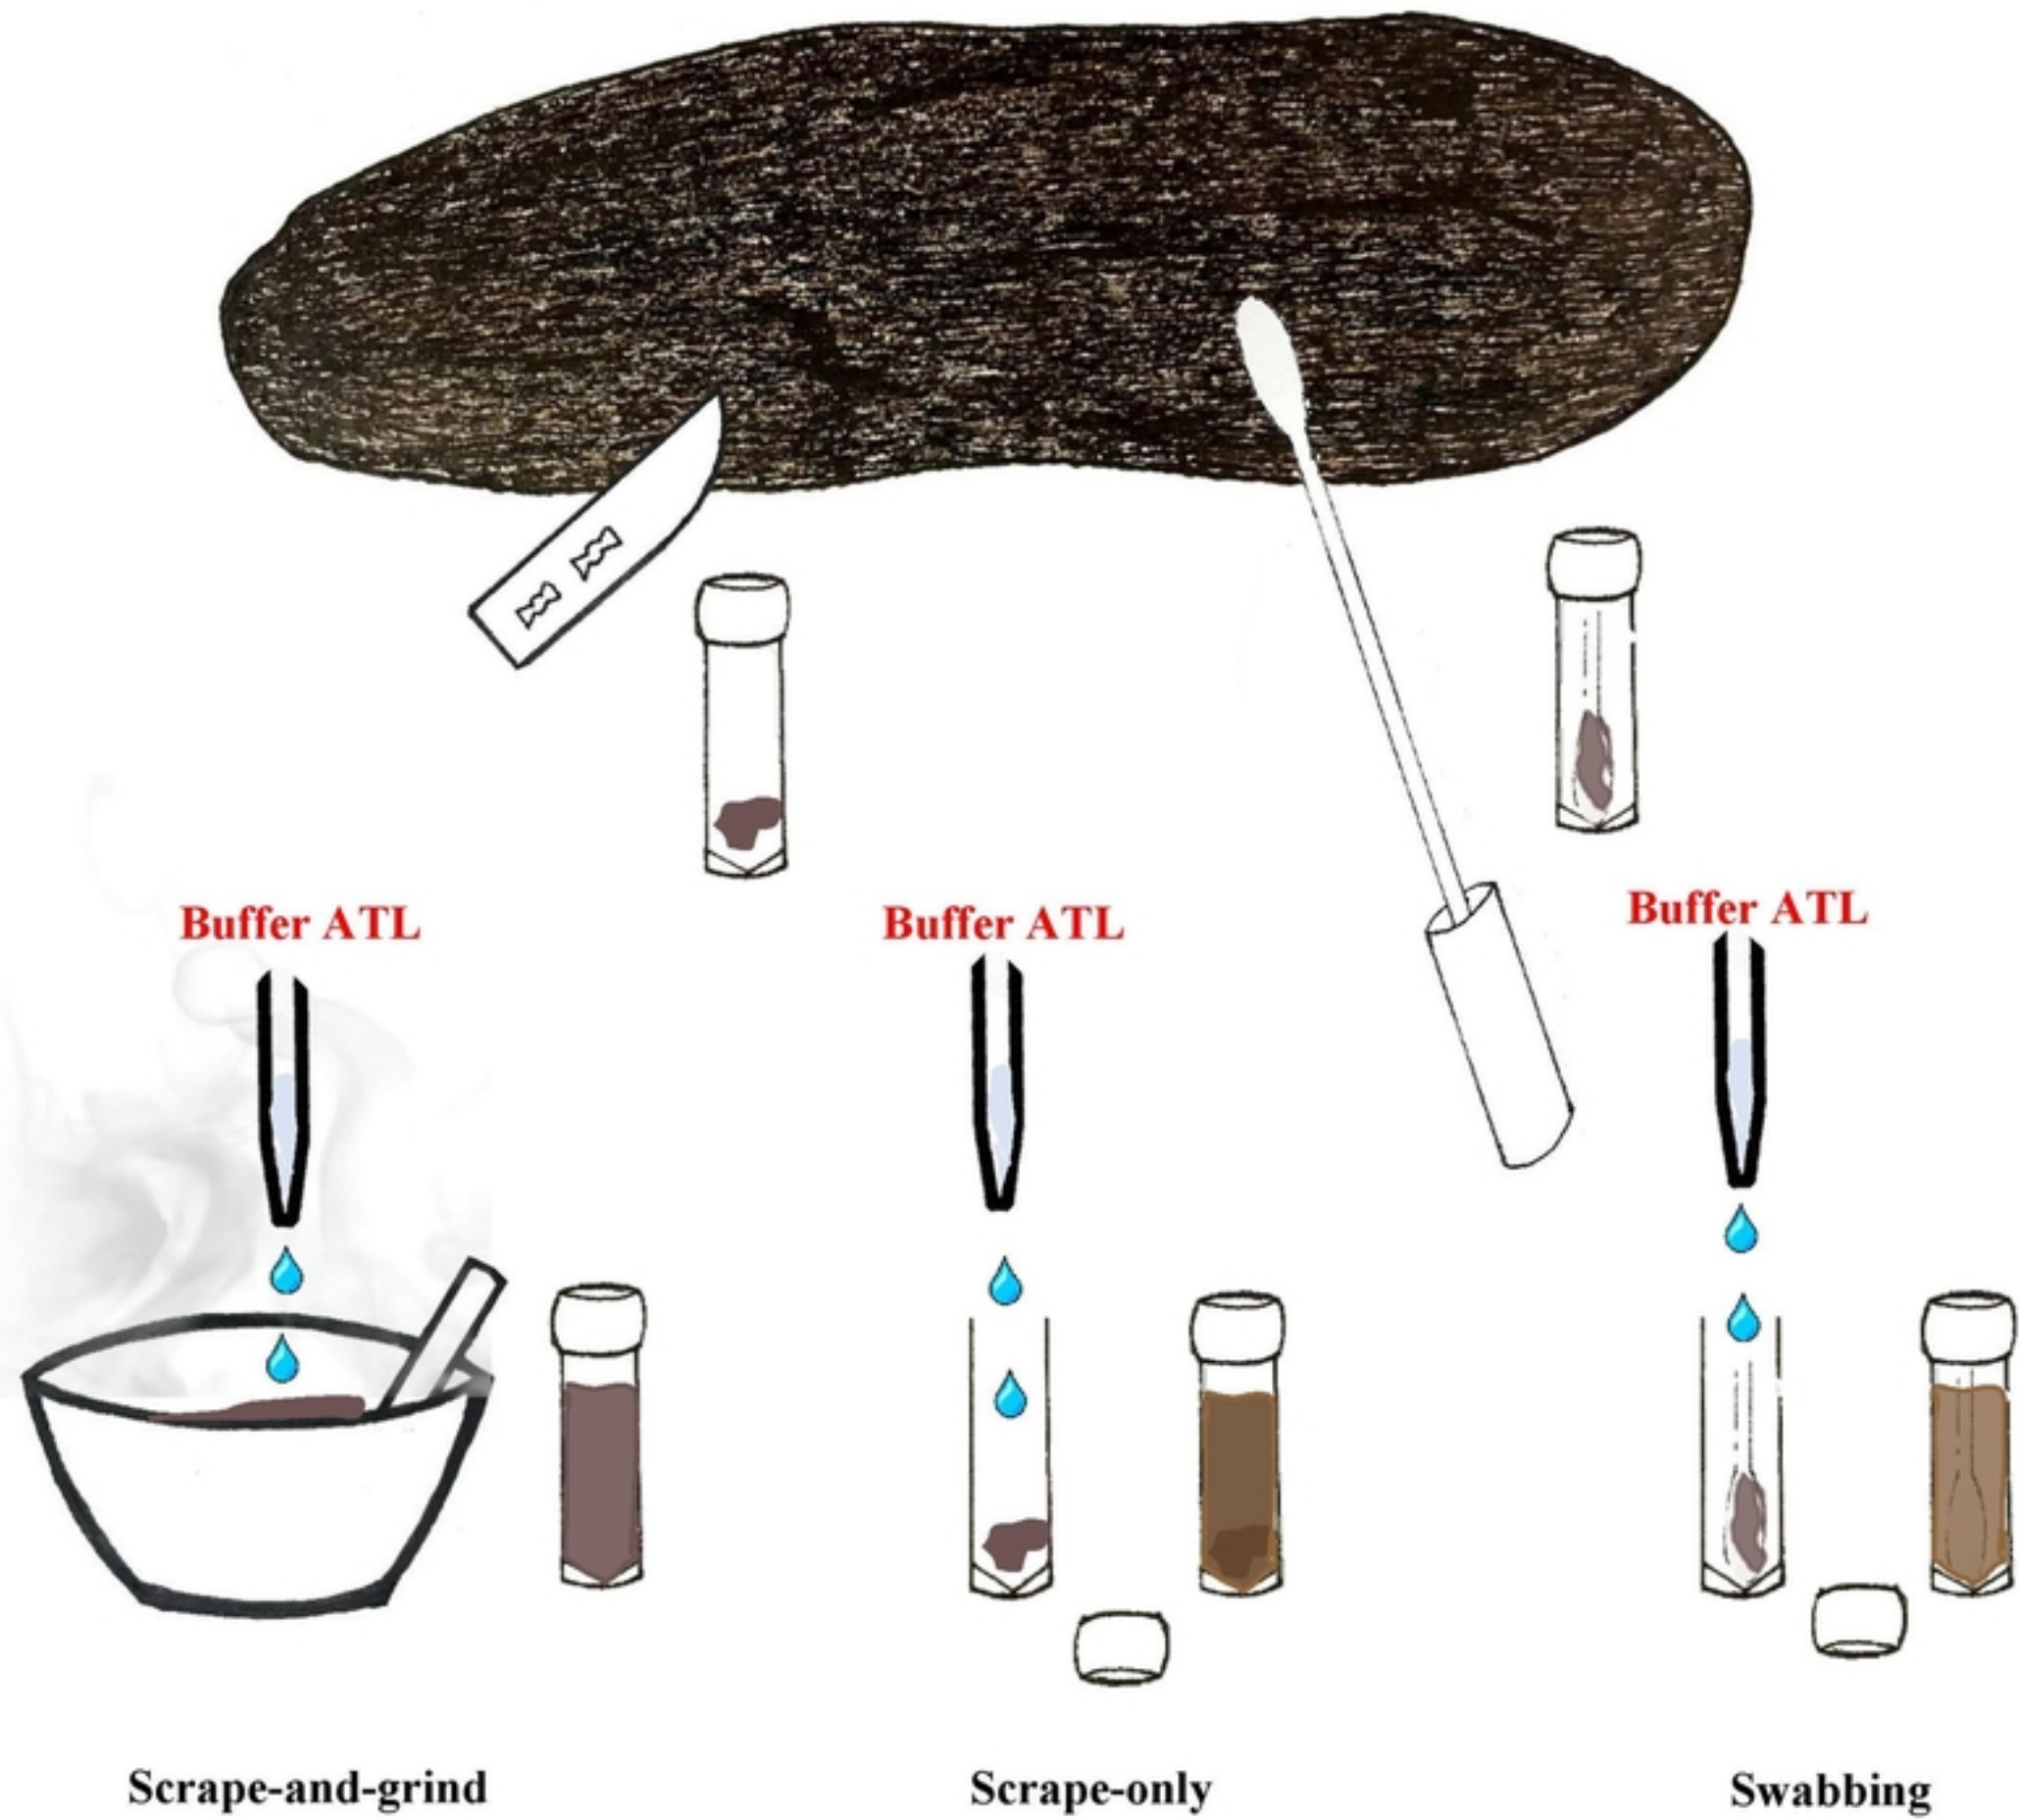

Fig2

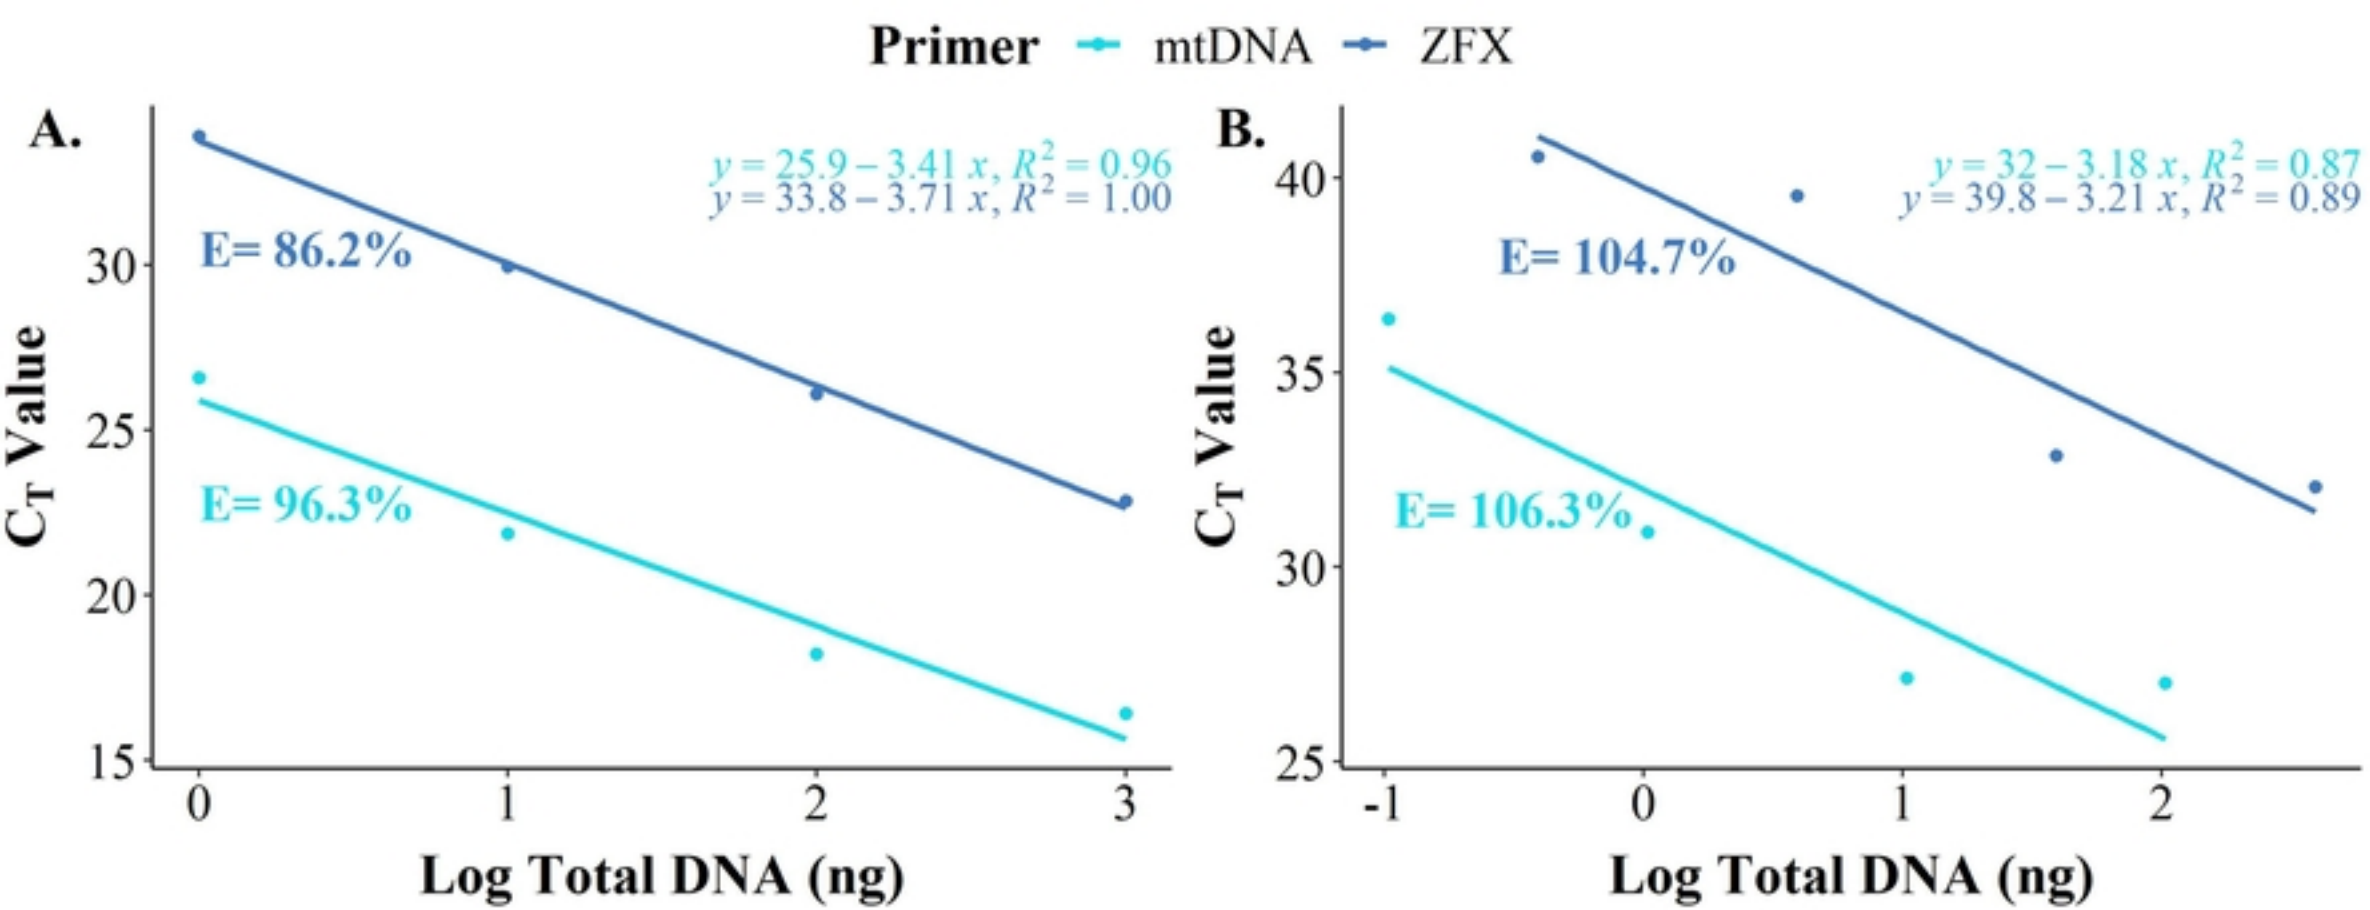

Fig3

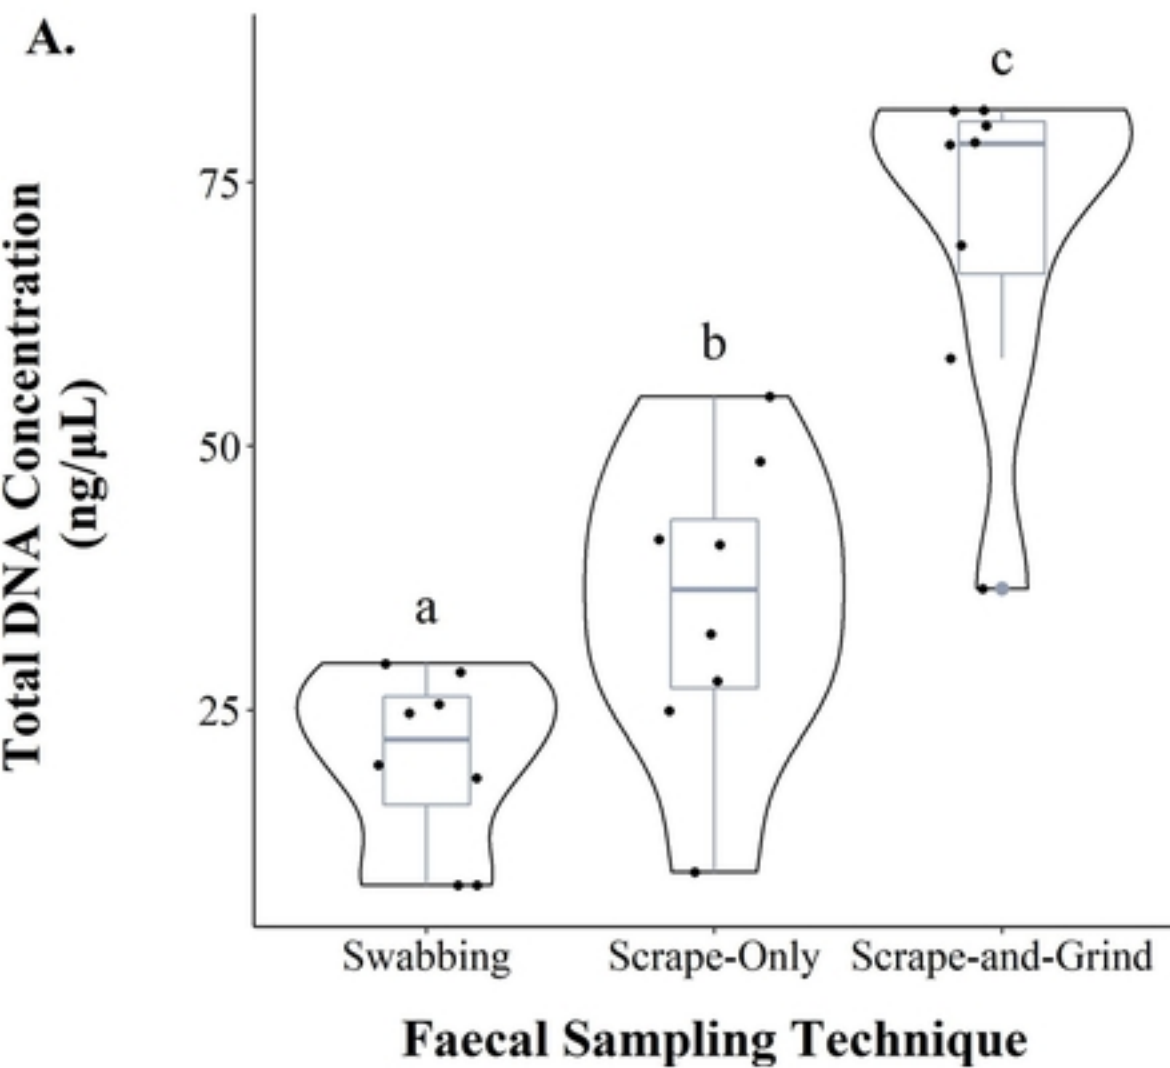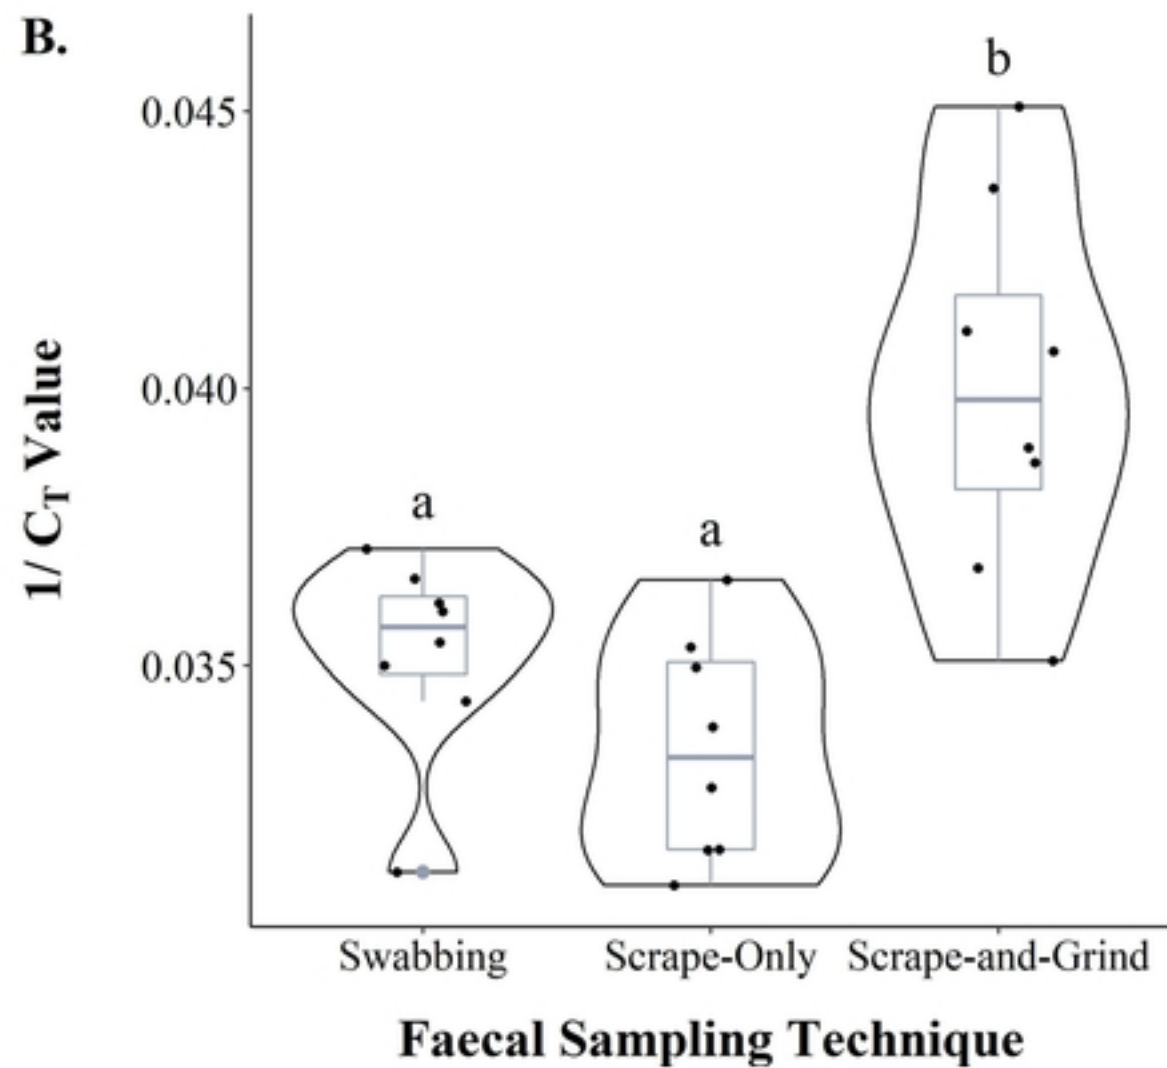

Fig4

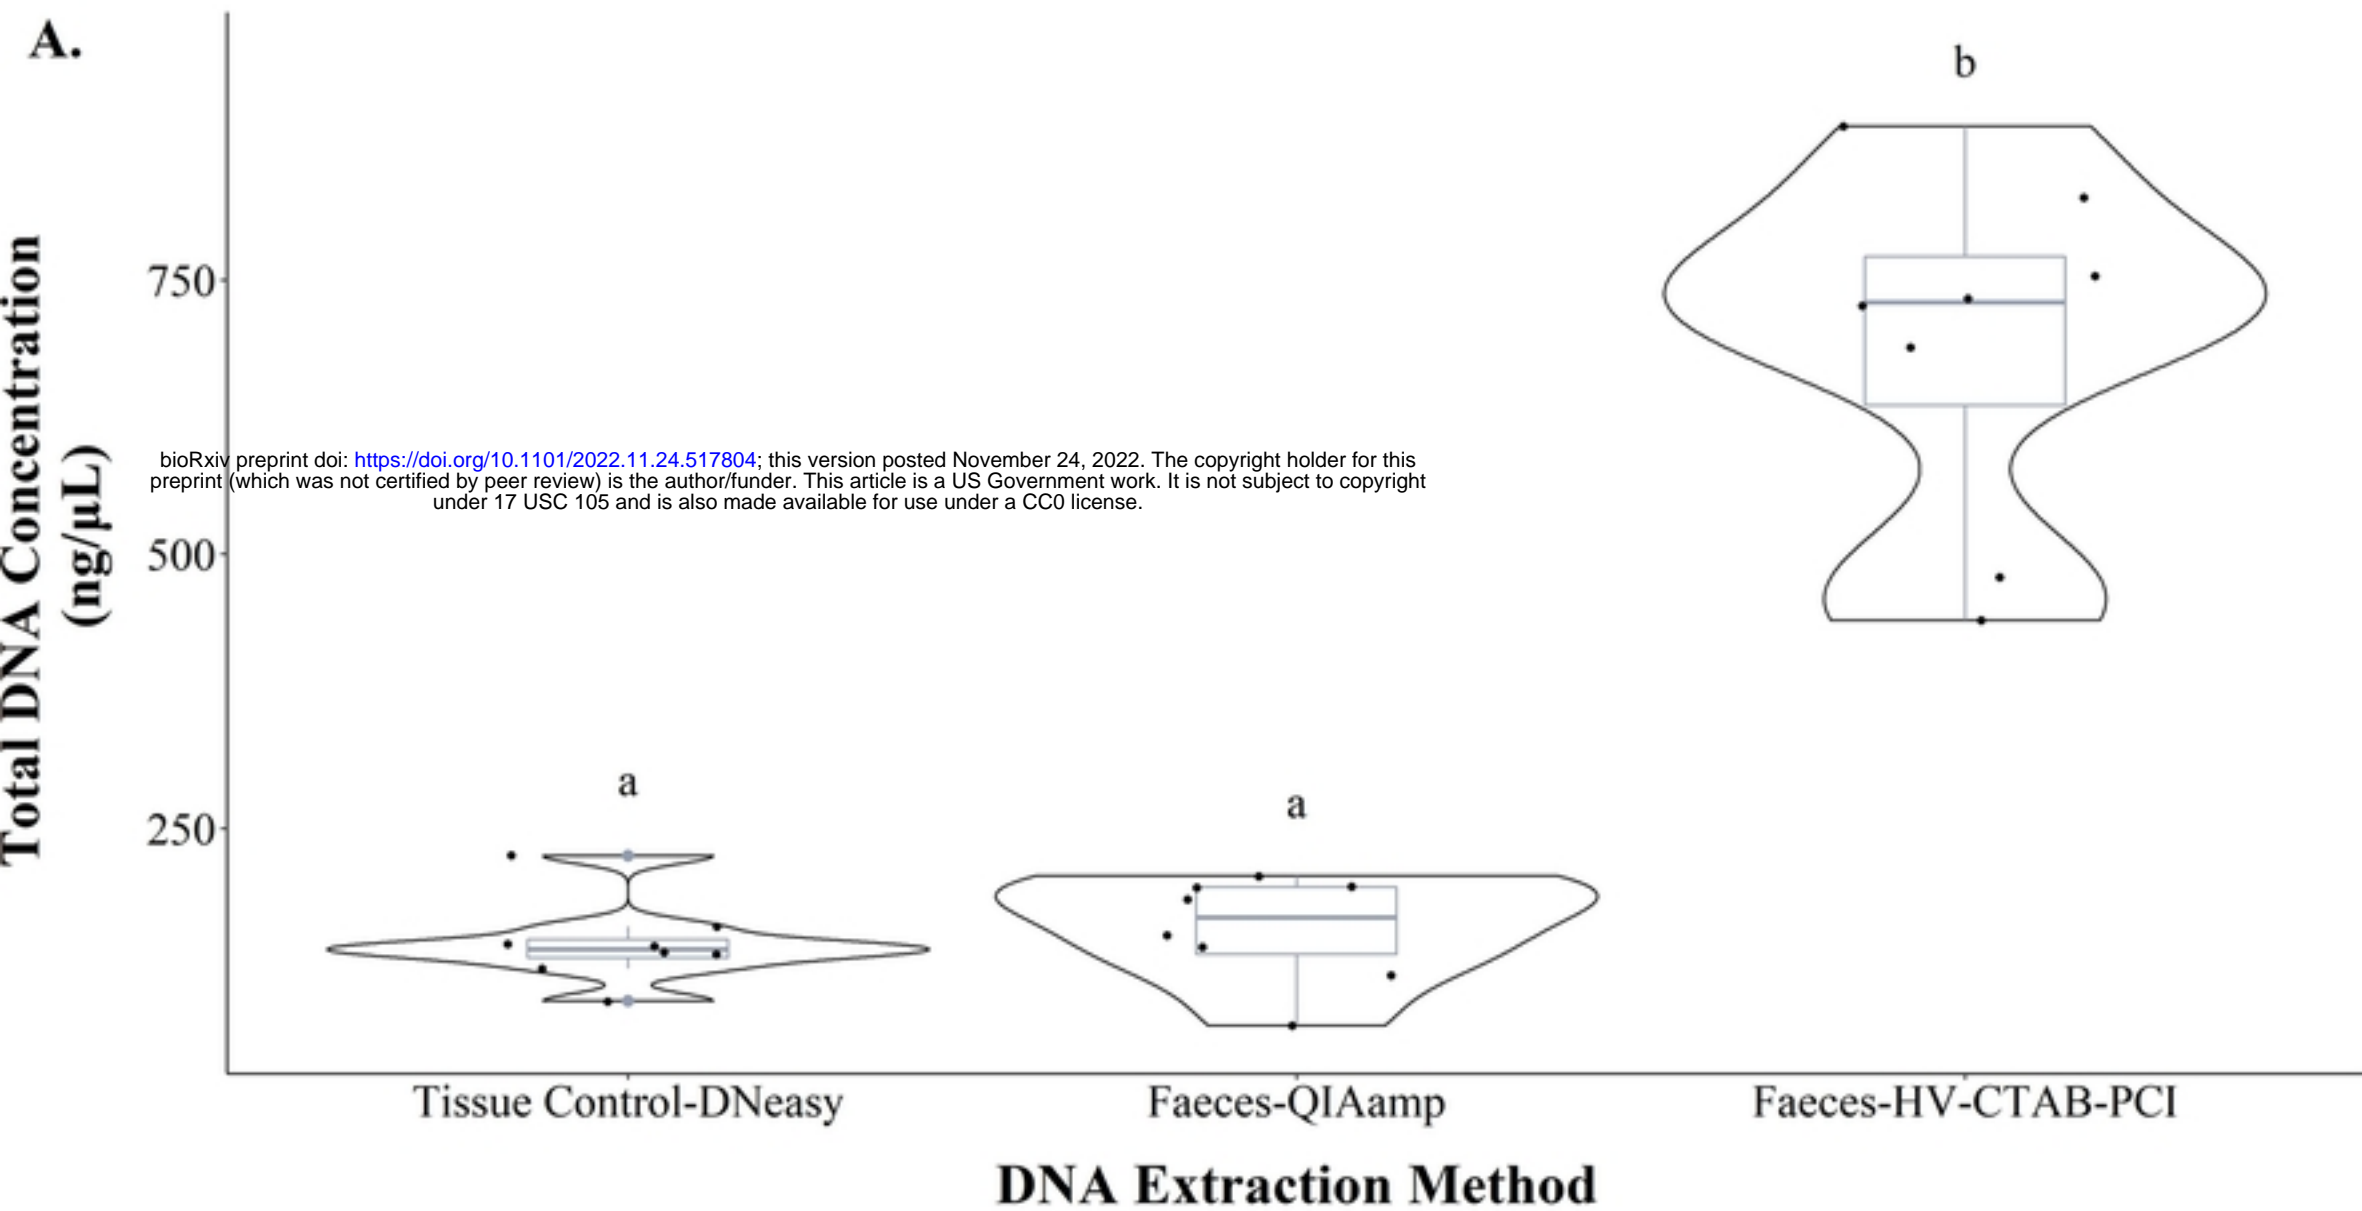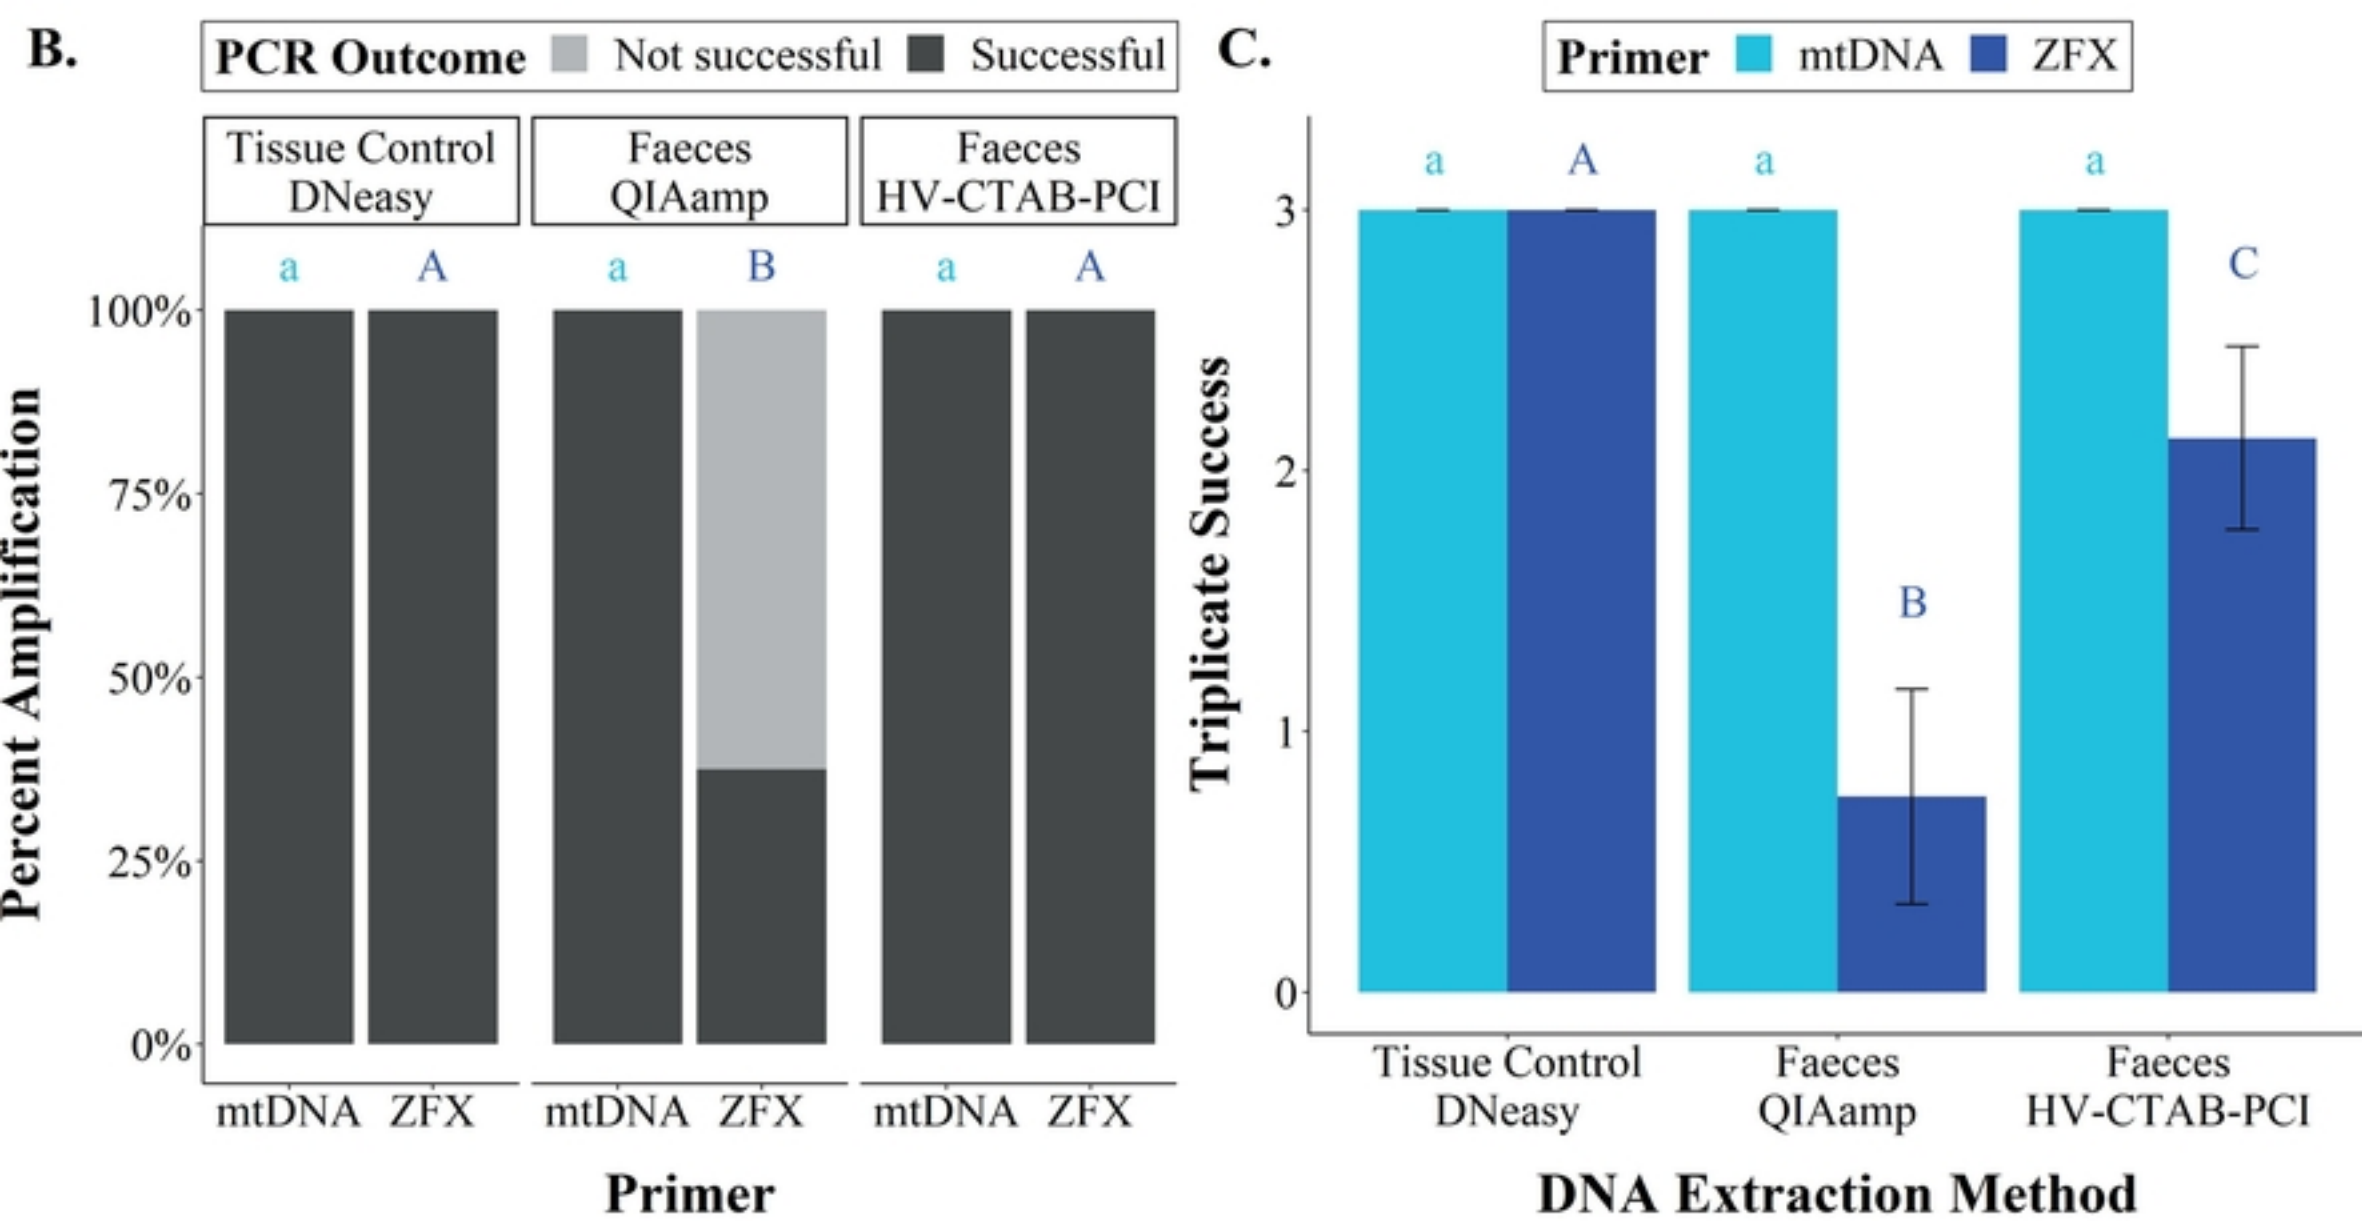

Fig5

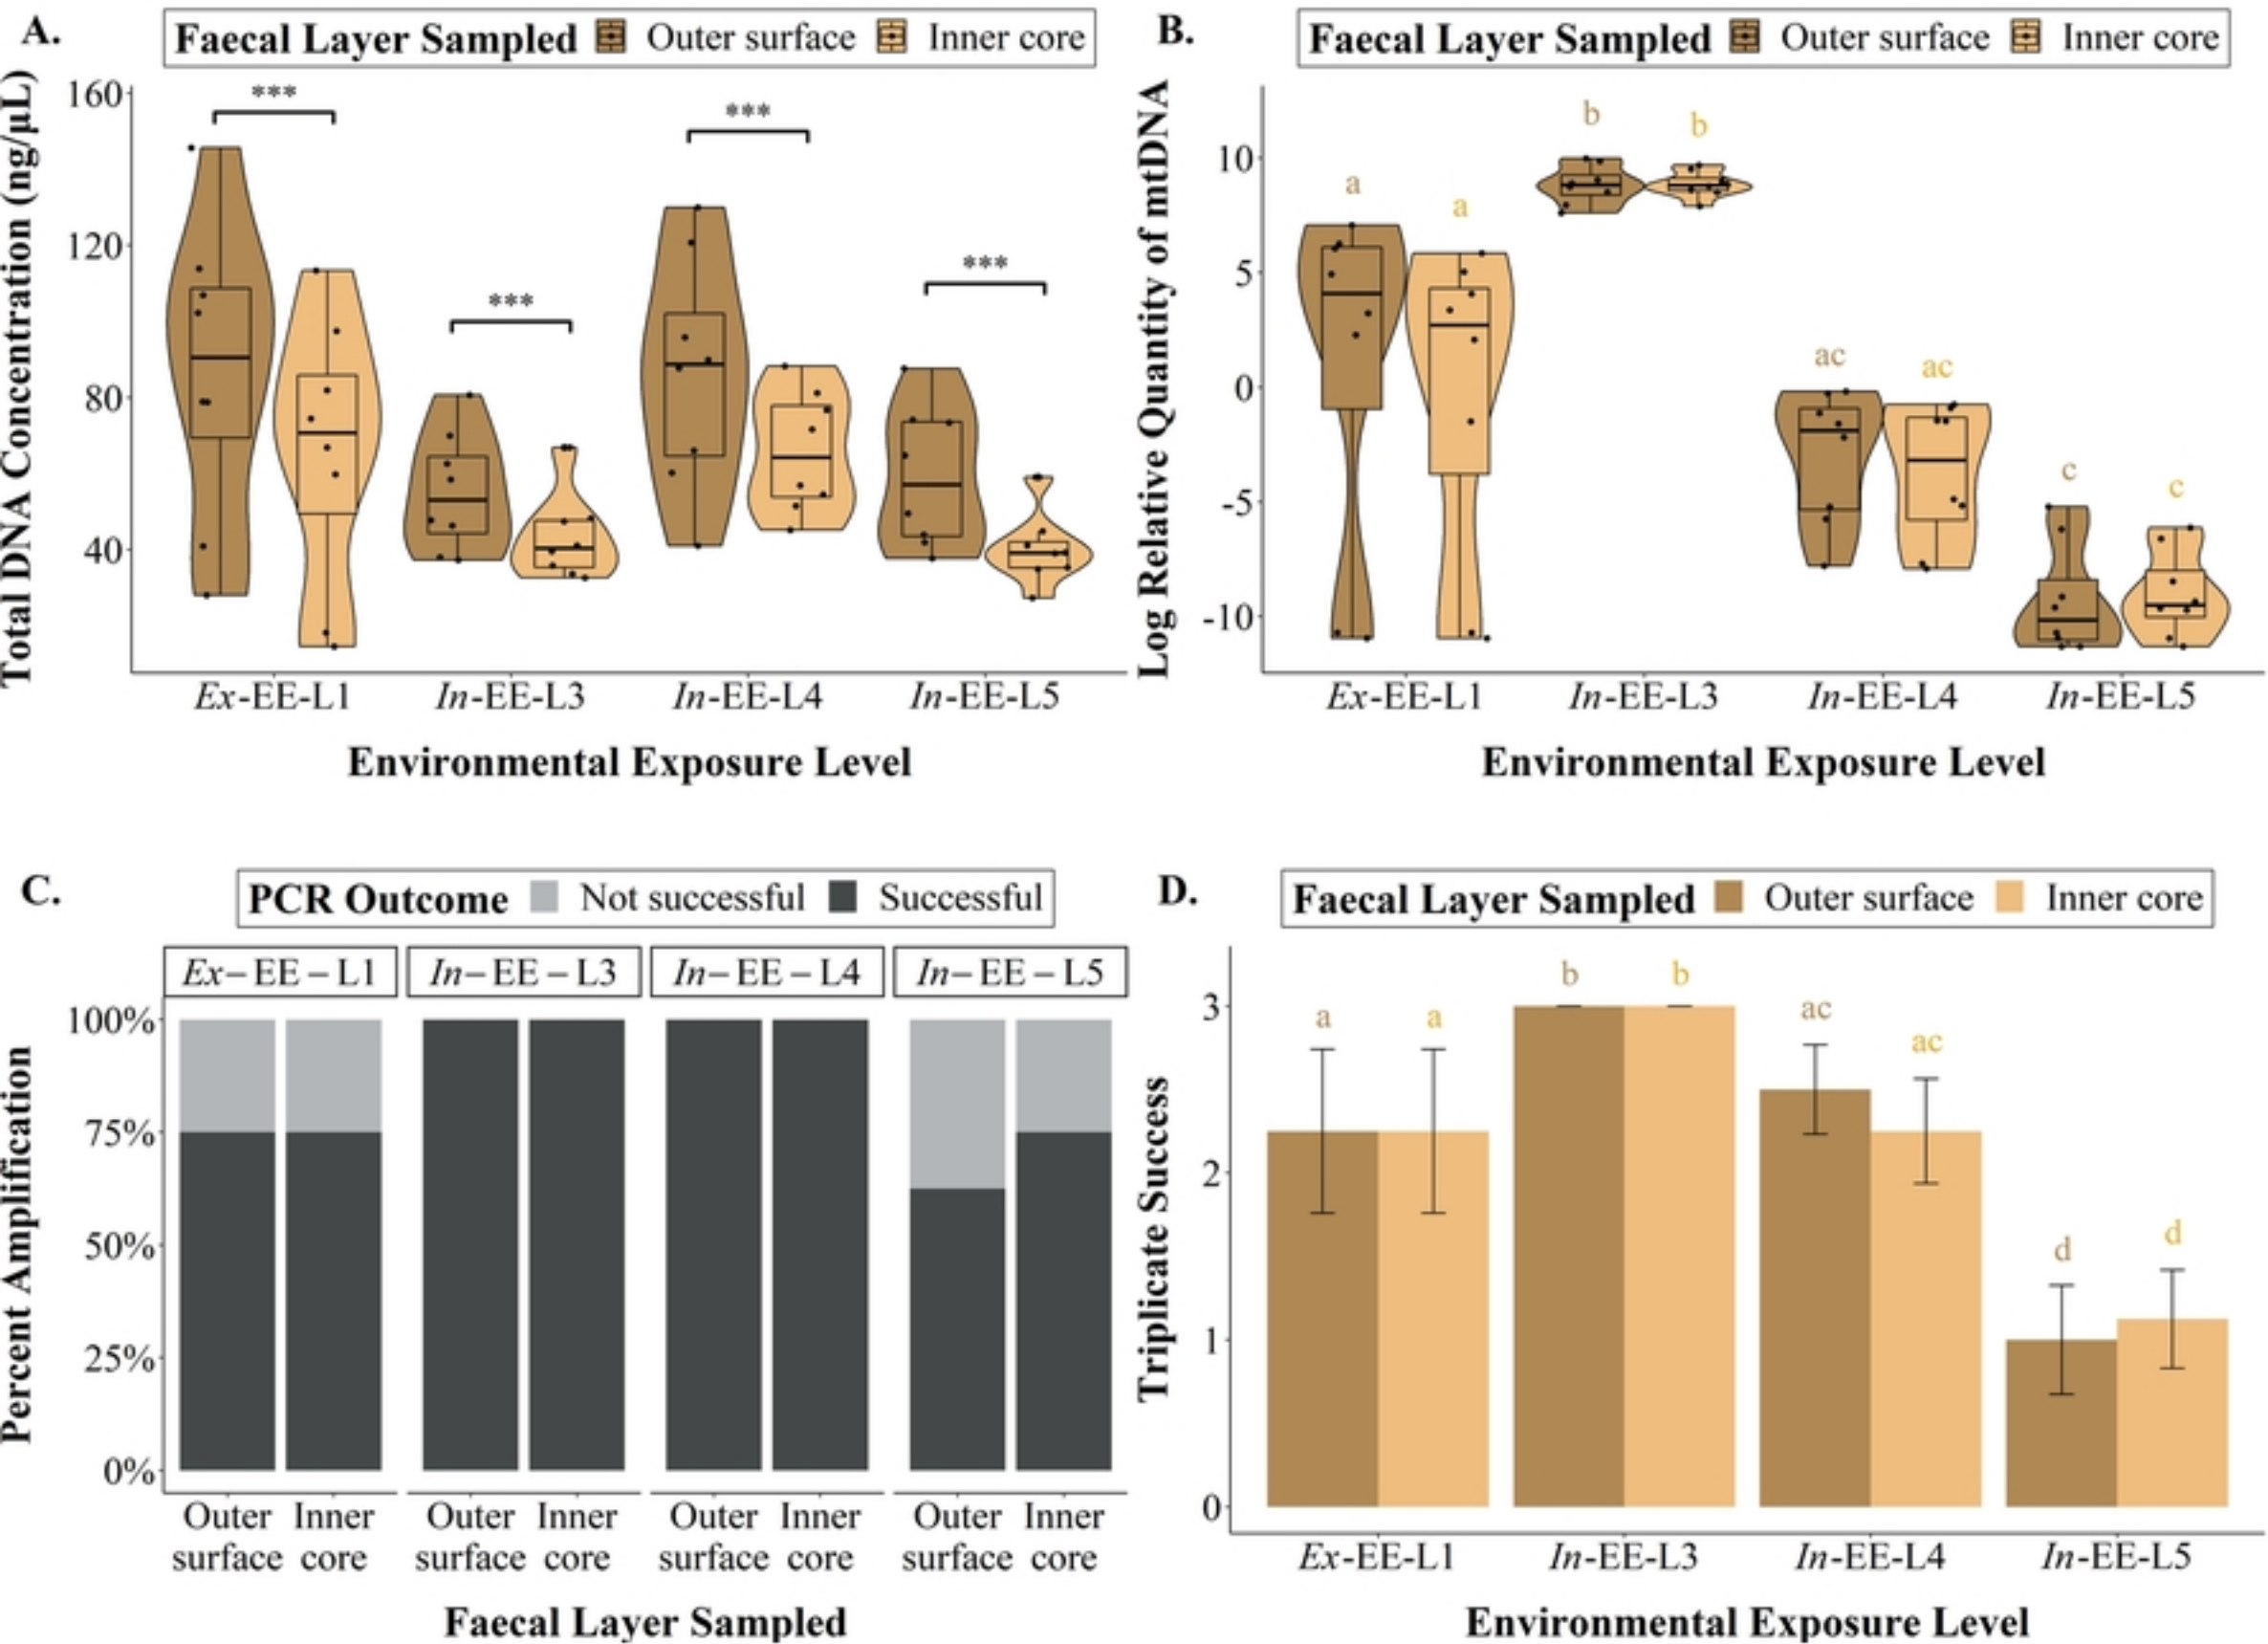

Fig6

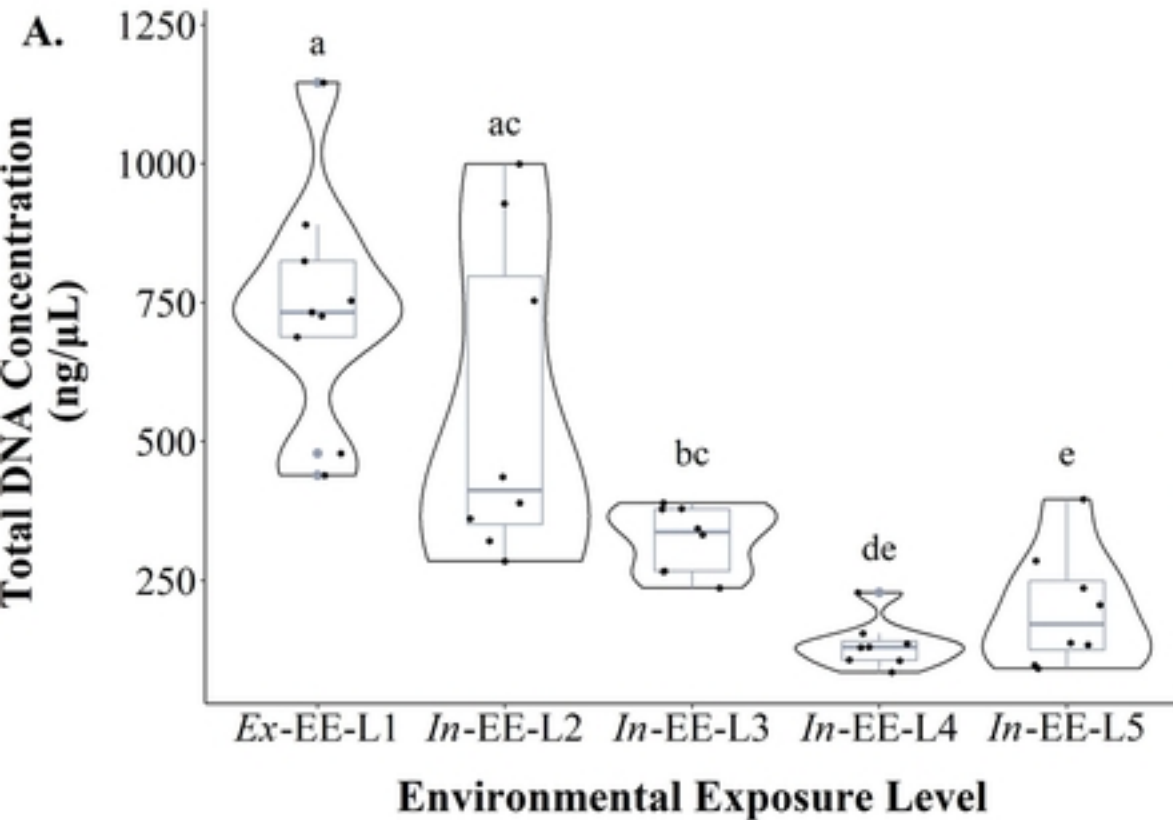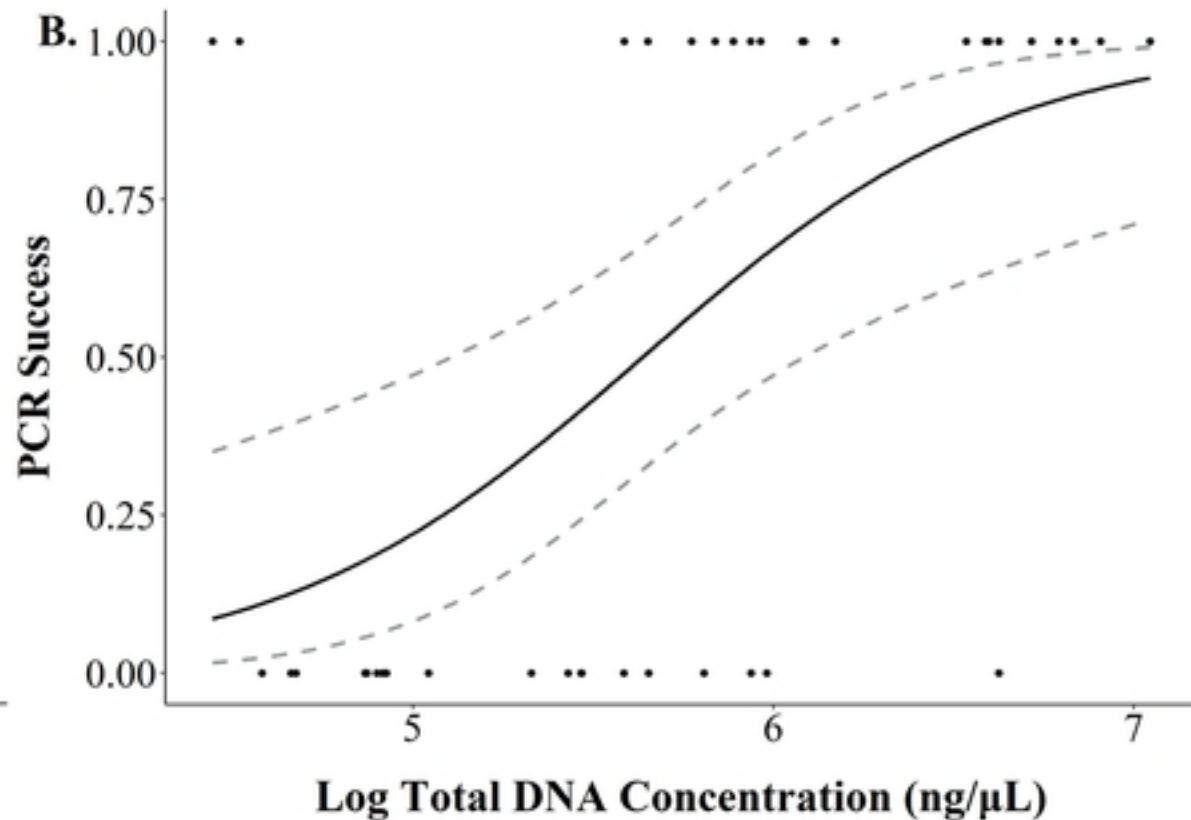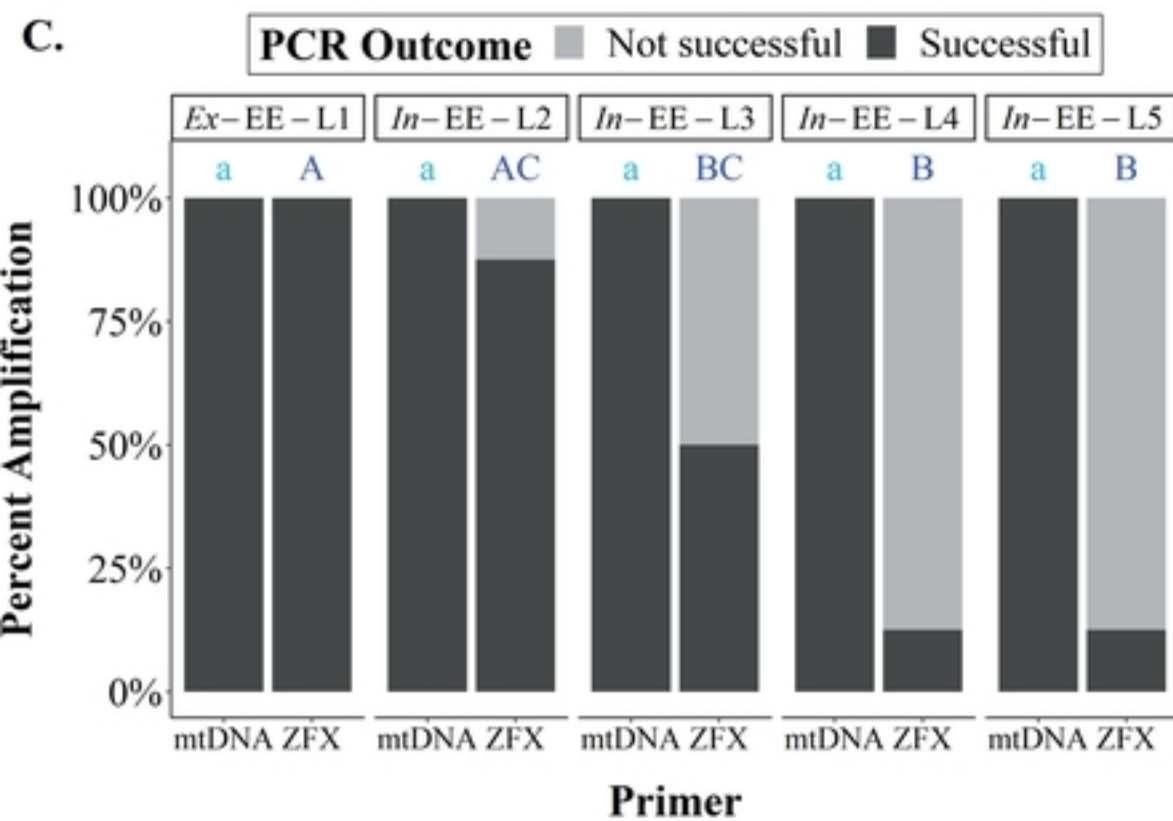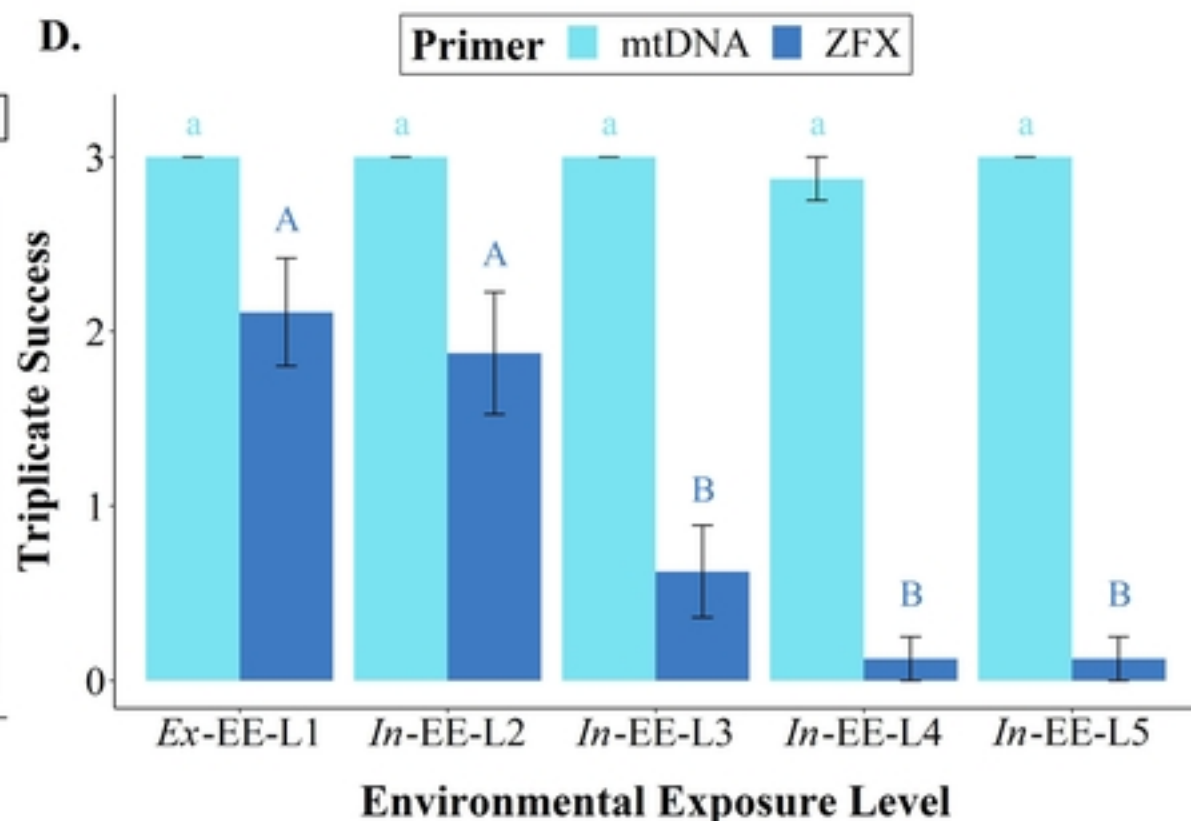

Fig7

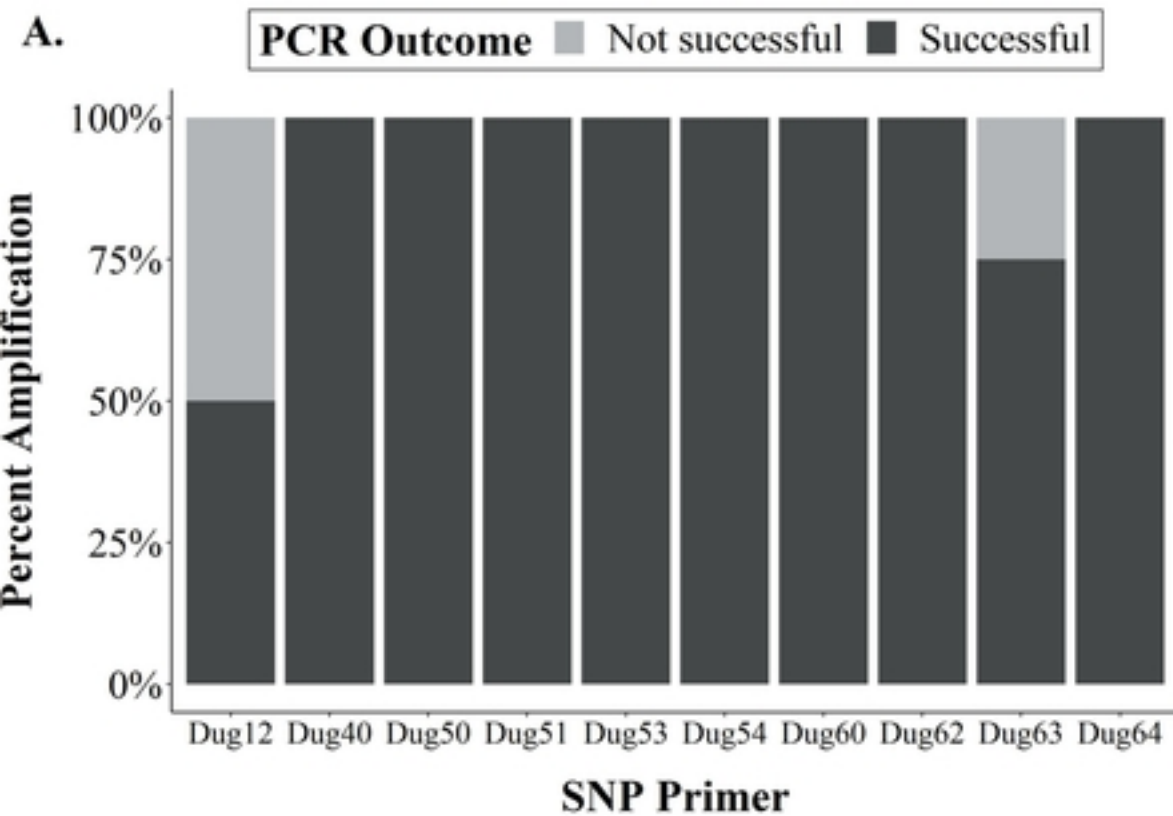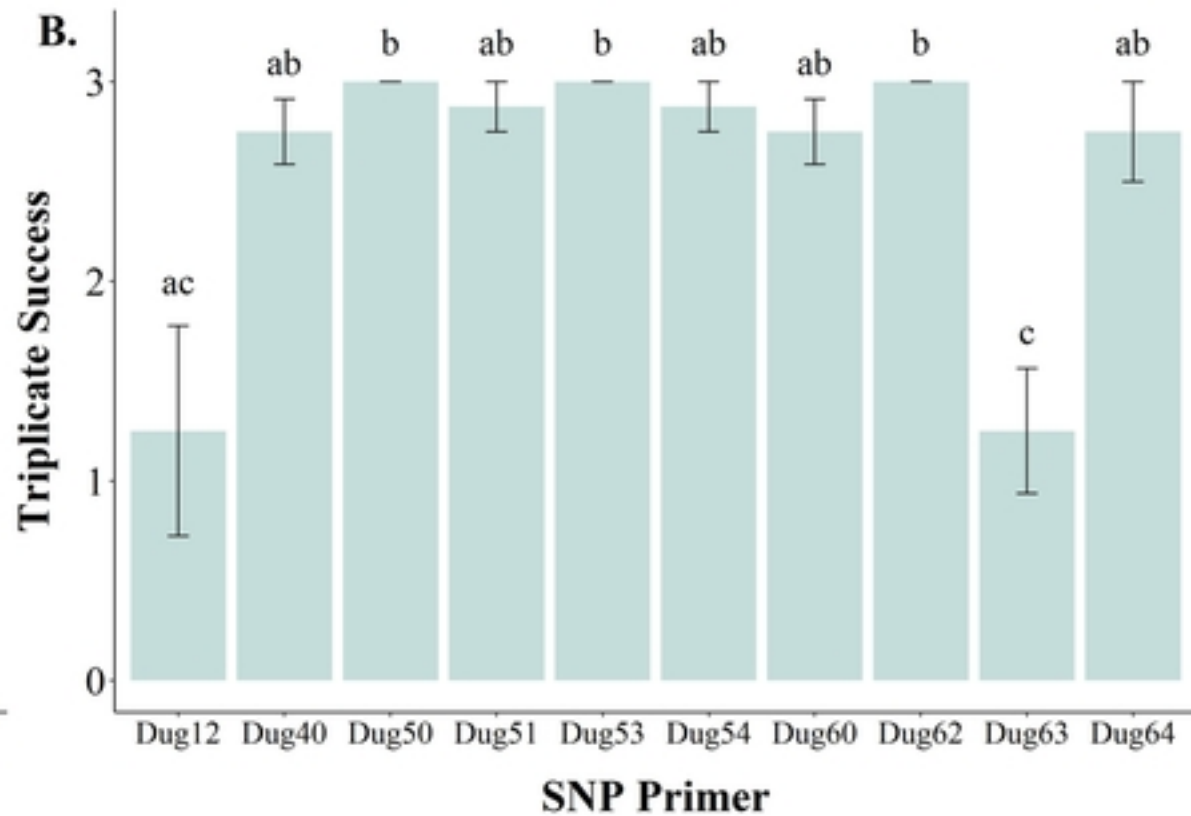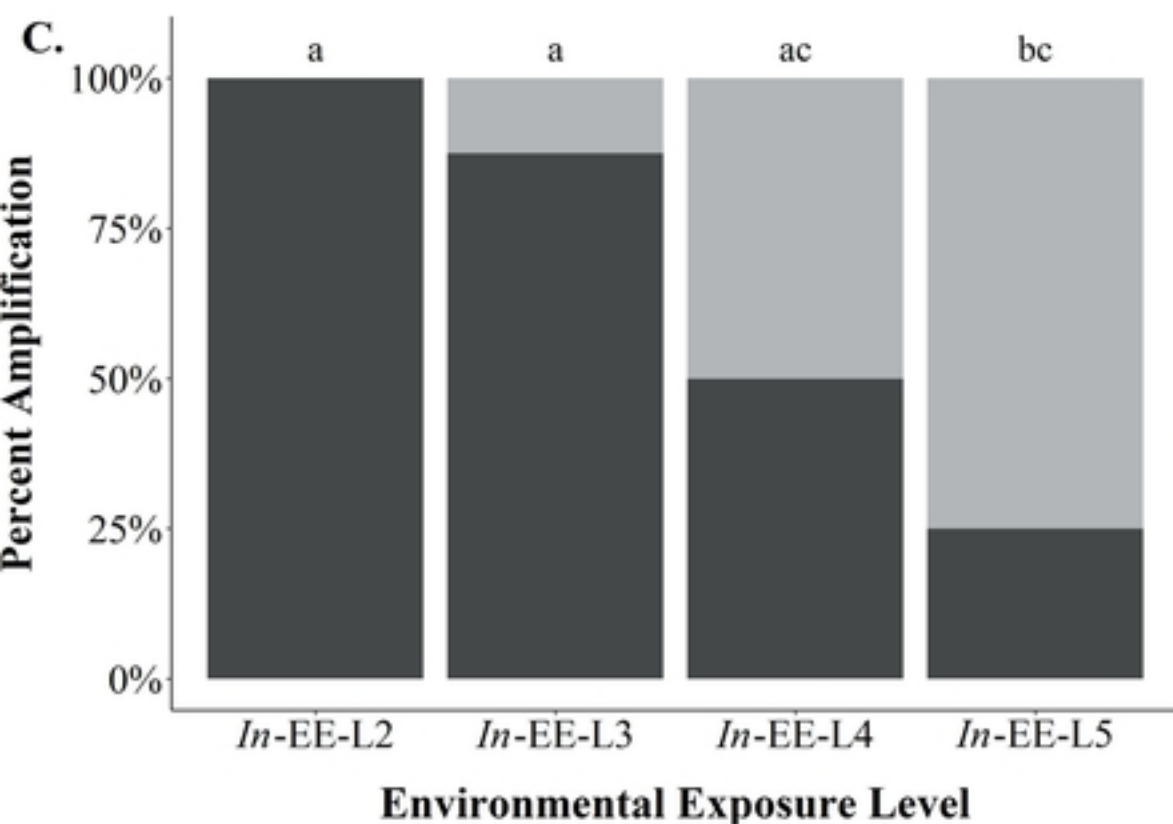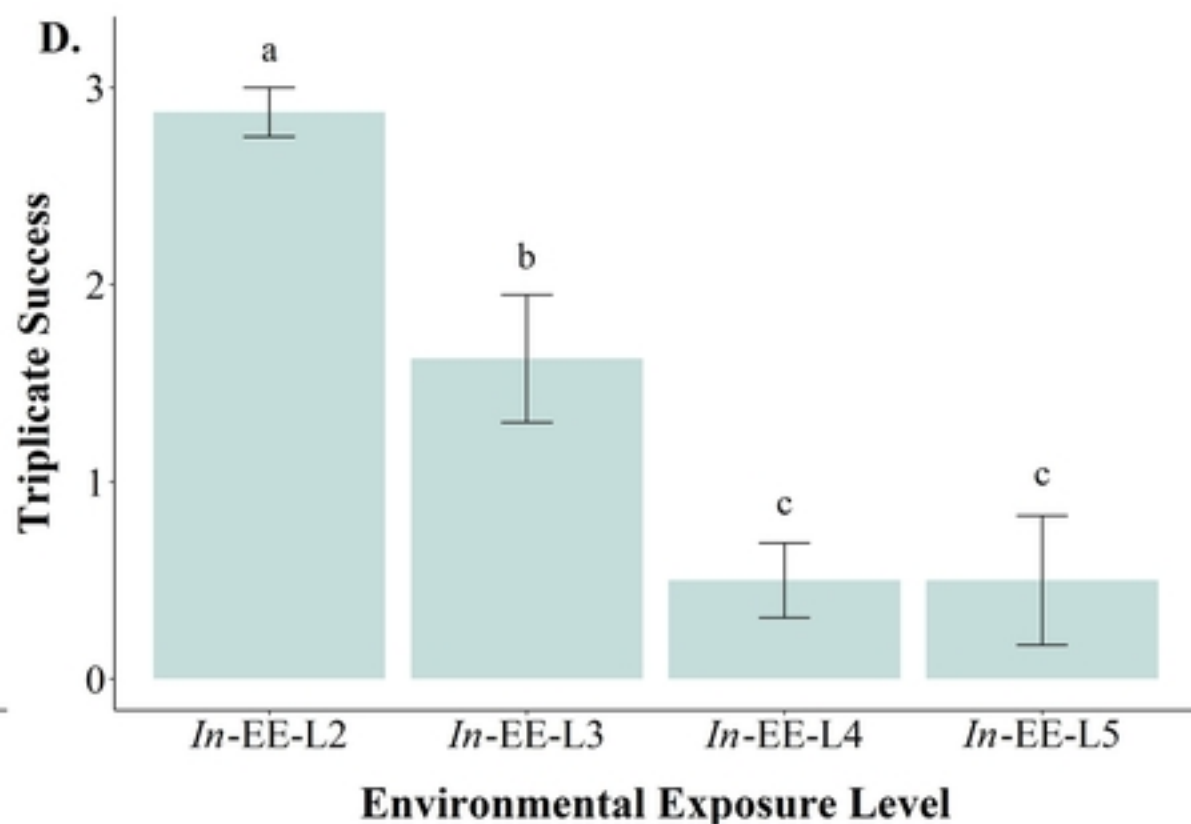

Fig8
